# Supplementary material
Source: publisher figshare collection journal article supplement (https://acs.figshare.com/ndownloader/files/4208650)

Supporting Information for:

## **Cooperative Hydrogen-bonding Effects in Silanediol Catalysis**

Ngon T. Tran, Sean O. Wilson, Annaliese K. Franz\*

*Department of Chemistry, One Shields Avenue, University of California, Davis, CA 95616*

|                                                                                 |     |
|---------------------------------------------------------------------------------|-----|
| <b>I. General Information</b>                                                   | S2  |
| <b>II. Preparation of Silanediol Catalysts</b>                                  | S2  |
| <b>III. Michael Reactions with <i>trans</i>-<math>\beta</math>-Nitrostyrene</b> | S6  |
| <b>IV. NMR Studies of Monosilanol and Silanediols</b>                           | S10 |
| <b>V. Preliminary Kinetic Studies</b>                                           | S16 |
| <b>VI. Crystallographic Data</b>                                                | S17 |
| <b>VII. Computational Studies of Silanol Acidity</b>                            | S20 |
| <b>VIII. <math>^1\text{H}</math> and <math>^{13}\text{C}</math> NMR spectra</b> | S33 |

## I. General Information

**Instruments and Analyses.** All nuclear magnetic resonance (NMR) spectra were obtained on Varian Mercury Plus 300 (300 MHz for  $^1\text{H}$ ; 75 MHz for  $^{13}\text{C}$ ; and 282 MHz for  $^{19}\text{F}$ ), Varian Inova 400 (400 MHz for  $^1\text{H}$ ; 100 MHz for  $^{13}\text{C}$ ), and/or Varian VNMRS 600 (600 MHz for  $^1\text{H}$ ; 119 MHz for  $^{29}\text{Si}$ ) at room temperature. Chemical shifts were reported in parts per million ( $\delta$  scale), and referenced according to the following standards: tetramethylsilane internal standard for  $^1\text{H}$  signals in chloroform, benzene residual solvent ( $\delta$  7.16) for  $^1\text{H}$  signals in benzene, deuterated chloroform, or benzene carbon resonances (middle peak is  $\delta$  77.1 or  $\delta$  128.1, respectively) for  $^{13}\text{C}\{^1\text{H}\}$  signals, trifluoromethylbenzene external standard (peak is  $\delta$  -62.7 in  $\text{C}_6\text{D}_6$ ) for  $^{19}\text{F}\{^1\text{H}\}$  signals, and tetramethylsilane external standard in  $\text{CDCl}_3$  for  $^{29}\text{Si}\{^1\text{H}\}$  signals. Coupling constants were reported in Hertz (Hz) and multiplicities were reported as follows: singlet (s), broad singlet (br s), doublet (d), triplet (t), quartet (q), octet (o), and multiplet (m).

**Materials and Purification.** Dichloromethane (DCM), hexane, ethyl acetate (EtOAc), toluene (PhMe), and diethyl ether ( $\text{Et}_2\text{O}$ ) were obtained from EMD Chemicals. Magnesium turnings, 1,2-dibromoethane, palladium on carbon (5 wt%), anhydrous magnesium sulfate, boron trichloride (1.0 M in DCM), and 2-mesitylmagnesium bromide solution (1.0 M in  $\text{Et}_2\text{O}$ ) were acquired from Sigma Aldrich. Indole, *n*-butyllithium (1.6 M in hexanes), 1,3-bis(trifluoromethyl)benzene, lithium aluminum hydride (4.0 M in  $\text{Et}_2\text{O}$ ), and trichlorosilane were purchased from Acros Organics. *Trans*- $\beta$ -nitrostyrene was purchased from Alfa-Aesar. 1-Bromonaphthalene was obtained from Eastman Kodak Company. All chemicals were used as purchased, without further purification. *n*-Butyllithium was titrated before use with diphenylacetic acid to obtain accurate concentration for reactions. Reactions were analyzed by thin layer chromatography (TLC) on EMD glass plates that were pre-coated with silica gel 60  $\text{F}_{254}$ , and the reactions were purified by column chromatography using Acros silica gel 60 Å (0.035-0.070 mm) or Sigma Aldrich silica gel 150 Å grade 62 (60-200 mesh).

## II. Preparation of Silanols and Silanediol Catalysts

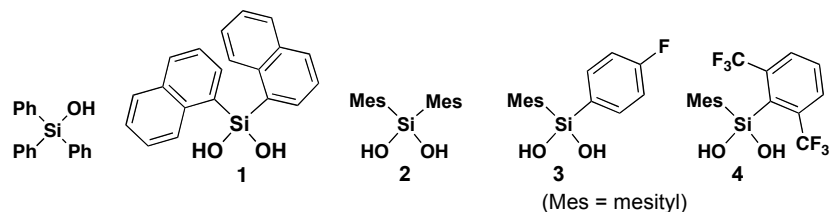

### General Procedures and Physical State of Silanediol Catalysts

Triphenylsilylanol and silanediol catalysts **1-4** were synthesized according to procedures previously reported in the literature, which ensure access to pure and dry silanediols that do not contain trace HCl.<sup>1,2,3,4,5</sup> Silanediol **1** was synthesized by two different methods (A and B, see

<sup>1</sup> Tran, N. T.; Min, T.; Franz, A. K. *Chem. Eur. J.* **2011**, *17*, 9897-9900.

<sup>2</sup> Rozga-Wijas; K.; Chojnowski, J. *Macromolecules*. **1996**, *29*, 2711-2721.

<sup>3</sup> Simons, R. S.; Haubrich, S. T.; Mork, B. V.; Niemeyer, M.; Power, P. P. *Main Group Chem.* **1998**, *2*, 275-283.

procedures below). Method A is used to prepare silanediol **1** from the di-(1-naphthyl)silane precursor, and method B is an alternate, shorter procedure to synthesize di-(1-naphthyl)silane. Silanediol **1** was evaluated as a catalyst in reactions in powdered, microcrystalline and macrocrystalline form. Triphenylsilanol and silanediol **2** were evaluated as catalysts in reactions in *microcrystalline* as well as *macrocrystalline* forms. Herein, *microcrystalline* is defined as needle-shaped crystal with width and length sizes of < 0.1 mm and *macrocrystalline* is defined as block-shaped crystal with dimensions > 0.2 mm. The microcrystalline form was obtained by slow evaporation from dichloromethane and the macrocrystalline form was obtained by growing crystals from slow evaporation from benzene. Silanediol catalyst **4** is a viscous film, and this form was used for all Michael reactions and binding studies. Spectral data for all silanediols is consistent with literature data.<sup>1</sup> Copies of all <sup>1</sup>H spectra are included to confirm purity.

Spectral data for Ph<sub>3</sub>SiOH: <sup>1</sup>H NMR (400 MHz, C<sub>6</sub>D<sub>6</sub>): δ 7.63 (dt, *J* = 6.4, 1.6 Hz, 6H), 7.17 (tt, *J* = 7.2, 1.6 Hz, 3H), 7.11 (m, 6H), 3.45 (s, 3H).

Spectral data for dimesitylsilanediol (**2**): <sup>1</sup>H NMR (400 MHz, CDCl<sub>3</sub>): <sup>1</sup>H NMR (600 MHz, CDCl<sub>3</sub>) δ 6.72 (s, 4H), 3.41 (s, 2H), 2.30 (s, 12H), 2.20 (s, 6H).

Spectral data for 4-fluorophenylmesitylsilanediol (**3**): <sup>1</sup>H NMR (600 MHz, CDCl<sub>3</sub>) δ 7.51 (dd, *J* = 9.0, 6.6 Hz, 2H), 6.96 (dd, *J* = 9.0, 8.4 Hz, 2H), 6.81 (s, 2H), 3.88 (br s, 2H), 2.35 (s, 6H), 2.29 (s, 3H).

Spectral data for (2,6-bis-(trifluoromethyl)phenyl)(mesityl)silanediol (**4**): <sup>1</sup>H NMR (400 MHz, C<sub>6</sub>D<sub>6</sub>): δ 7.91 (br d, *J* = 8.0 Hz, 1H), (br s, 1H), 7.24 (br d, *J* = 8.0 Hz, 1H), 6.70 (s, 2H), 3.49 (s, 2H), 2.32 (s, 6H), 2.09 (s, 3H).

### Procedure for the Synthesis of Silanediol **1** (Method A)

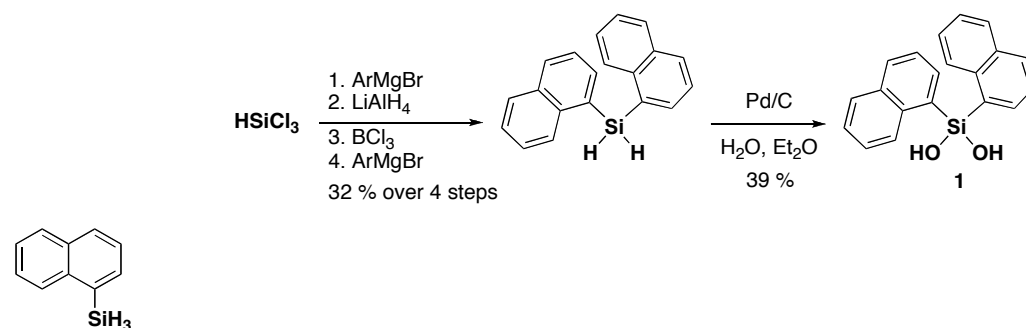

**1-Naphthylsilane.**<sup>6</sup> An oven-dried, round-bottom flask was charged with Mg (0.969 g, 39.88 mmol, 2.01 equiv), anhydrous diethyl ether (20 mL), and a stirbar. After purging with argon for 15 min, 1,2-dibromoethane (0.02 mL, 0.23 mmol, 0.01 equiv) was added and the reaction was allowed to stir at room temperature until it became a faint cloudy mixture. At which point, 1-bromonaphthalene (2.78 mL, 19.87 mmol, 1.00 equiv) was added and the reaction was allowed to stir for 2 h at reflux. Upon cooling to room temperature, the aryl Grignard reagent was transferred by syringe to a round-bottom flask containing HSiCl<sub>3</sub> (2.05 mL, 20.31 mmol, 1.02

<sup>4</sup> Minge, O.; Nogai, S.; Schmidbaur, H. *Z. Naturforsch., B: Chem. Sci.* **2004**, *59*, 153-160.

<sup>5</sup> Söldner, M.; Sandor, M.; Schier, A.; Schmidbaur, H. *Chem. Ber./Recueil.* **1997**, *130*, 1671-1676.

<sup>6</sup> Boudin, A.; Cerveau, G.; Chuit, C.; Corriu, R. J. P.; Reye, C. *Angew. Chem.* **1986**, *98*, 472-473.

equiv) in anhydrous diethyl ether (20 mL). After stirring at room temperature for 1 h, the reaction was cooled to -78 °C and LiAlH<sub>4</sub> (4.0 M in Et<sub>2</sub>O, 15.0 mL, 60.0 mmol, 3.02 equiv) was added dropwise. The reaction was allowed to stir while warming up to room temperature over 2 h. Then the reaction was cooled to -78 °C before the addition of 10 mL of Rochelle's salt (NaKtartrate, sat. aq.) and the resulting mixture was filtered over celite and washed with diethyl ether (5 x 15 mL). The filtrate was concentrated *in vacuo*, and purification by distillation to afford 1-naphthylsilane (1.939 g, 62 %) as a colorless oil. Spectra matched the previously reported values. <sup>1</sup>H NMR (600 MHz, CDCl<sub>3</sub>): δ 7.92 (br d, *J* = 8.4 Hz, 2H), 7.77 (m, 4H), 7.44 (m, 1H), 7.41 (m, 1H), 7.36 (dd, *J* = 8.4, 7.2 Hz, 1H), 5.56 (s, 3H); <sup>13</sup>C NMR (150 MHz, CDCl<sub>3</sub>): δ 137.5, 136.9, 133.1, 131.1, 129.0, 128.0, 127.4, 126.6, 126.1, 125.4; <sup>29</sup>Si NMR (119 MHz, CDCl<sub>3</sub>): δ -61.6.

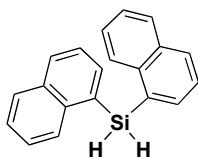

**Di-(1-naphthyl)silane.**<sup>7</sup> 1-Naphthylsilane (1.939 g, 12.25 mmol, 1.00 equiv) was dissolved in hexanes (15 mL) and the resulting solution was purged with argon. Under positive argon pressure, BCl<sub>3</sub> (1.0 M in DCM, 12.25 mL, 12.25 mmol, 1.00 equiv) was added dropwise. After 18 h, the solvent was removed *in vacuo* and the chloro(1-naphthyl)silane was transferred into another round bottom flask using anhydrous diethyl ether (20 mL). After purging with argon for 15 min and cooling to 0 °C, 1-naphthylmagnesium bromide was added dropwise. [Prepared according to the procedure described above using Mg (0.628 g, 25.82 mmol, 2.11 equiv) and 1-bromonaphthalene (1.80 mL, 12.87 mmol, 1.05 equiv).] After stirring for 3 h at room temperature, the reaction was quenched with 10 mL of sat. aq. NaHCO<sub>3</sub>. The aqueous layer was extracted with ethyl acetate (3 x 5 mL), and the combined organic layer was washed with brine (2 x 5 mL), dried over MgSO<sub>4</sub>, filtered, and concentrated *in vacuo* to give a pale yellow film. The crude product was purified using column chromatography with hexanes to yield 1.792 g of silane (51 %) as a white crystalline solid. <sup>1</sup>H NMR (600 MHz, CDCl<sub>3</sub>): δ 8.08 (m, 2H), 7.83 (br d, *J* = 8.4 Hz, 2H), 7.78 (m, 2H), 7.71 (dd, *J* = 6.6, 1.2 Hz, 2H), 7.39 (m, 4H), 7.32 (dd, *J* = 6.6, 7.8 Hz, 2H), 5.56 (s, 2H); <sup>13</sup>C NMR (150 MHz, CDCl<sub>3</sub>): 137.6, 137.0, 133.3, 131.1, 129.8, 129.0, 128.1, 126.5, 126.0, 125.5; <sup>29</sup>Si NMR (119 MHz, CDCl<sub>3</sub>): δ -38.7.

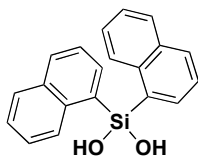

**Di-(1-naphthyl)silane-1,1-diol (1).**<sup>8,9</sup> To a mixture containing Pd/C (5 wt%, 0.662 g, 0.31 mmol, 0.05 equiv), deionized water (0.57 mL, 32 mmol, 5.0 equiv) and anhydrous diethyl ether (10 mL), was added di-(1-naphthyl)silane (1.792 g, 6.30 mmol, 1.0 equiv). The hydrogen gas that formed

<sup>7</sup> Tour, J. M.; John, J. A.; Stephens, E. B. *J. Organomet. Chem.* **1992**, 429, 301-310.

<sup>8</sup> Kondo, S.-I.; Harada, T.; Tanaka, R.; Unno, M. *Org. Lett.* **2006**, 8, 4621-4624.

<sup>9</sup> Schafer, A. G.; Wieting, J. M.; Mattson, A. E. *Org. Lett.* **2011**, 13, 5228-5231.

was allowed to escape through a vent needle. After stirring for 18 h at room temperature, the Pd/C was removed by filtration and the filtrate was dried over MgSO<sub>4</sub>. The crude product was purified by column chromatography (10:1 hexanes/diethyl ether) to afford di-(1-naphthyl)silanediol (**1**) as a white powder (0.782 g, 39 %). Spectra matched the previously reported values<sup>9</sup> and showed that the silanediol did not contain any water or trace HCl in the sample, which is possible when preparing the catalyst directly from the silyl chloride. <sup>1</sup>H NMR (400 MHz, CDCl<sub>3</sub>): δ 8.31 (d, *J* = 8.0 Hz, 2H), 7.96 (dd, *J* = 6.8, 1.2 Hz, 2H), 7.92 (d, *J* = 8.0 Hz, 2H), 7.84 (d, *J* = 7.6 Hz, 2H), 7.47-7.37 (m, 6H), 3.34 (s, 2H); <sup>13</sup>C NMR (100 MHz, CDCl<sub>3</sub>): 136.8, 135.8, 133.5, 132.8, 131.5, 129.0, 128.5, 126.6, 125.9, 125.3; <sup>29</sup>Si NMR (119 MHz, CDCl<sub>3</sub>): δ -25.2. Microcrystalline and macrocrystalline forms of silanediol **1** were grown by dissolving the silanediol in either dichloromethane or a 1:1 mixture of dichloromethane/diethyl ether, and allowing the solvent to slowly evaporate. A suitable crystal of the latter was used for X-ray structure analysis. Co-crystals of silanediol **1** with diethyl ether were grown from slow evaporation of the silanediol in a 1:10 mixture of dichloromethane/diethyl ether solvents.

### Procedure for the Synthesis of Silanediol **1** (Method B)

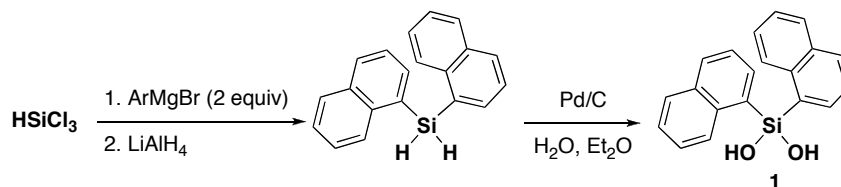

**Di-(1-naphthyl)silanediol (**1**).**<sup>8,9</sup> An alternate procedure was used for the di-(1-naphthyl)silane and then hydrolysis was performed using the same procedure as described above in Method A. 1-Bromonaphthalene (1.49 mL, 10 mmol, 2 equiv) and magnesium (485 mg, 10 mmol, 2 equiv) were added to an Ar purged, oven dried round-bottom flask. The mixture was diluted with 20 mL anhydrous Et<sub>2</sub>O and heated at reflux for 3 h. Then the reaction was allowed to cool to room temperature and transferred to a cooled (-78 °C), Ar purged solution of trichlorosilane (0.5 mL, 5 mmol, 1 equiv) in Et<sub>2</sub>O (50 mL). The mixture was allowed to warm to room temperature over 12 h. The solution was then cooled to -78 °C and a solution of lithium aluminum hydride solution (4.0 M in Et<sub>2</sub>O, 1.25 mL, 5 mmol, 1 equiv) was added dropwise. The solution was allowed to warm to room temperature. The reaction was once again cooled to -78 °C and quenched with Rochelle's salt (NaKtartrate, sat. aq.), filtered over celite, and washed with Et<sub>2</sub>O (5 x 15 mL). The product was concentrated *in vacuo*. Hydrolysis to the silanediol was carried out using Pd/C and water according to the procedure described above.

### III. Michael Additions with *trans*- $\beta$ -Nitrostyrene

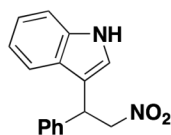

**3-(2-nitro-1-phenylethyl)-1H-indole (9).** *trans*- $\beta$ -Nitrostyrene (56 mg, 0.375 mmol, 1 equiv), catalyst (0.075 mmol, 20 mol %) and 1.0 mL of DCM were added to a vial containing a stirbar and stirred at room temperature. After 10 min, indole **7** (67 mg, 0.563 mmol, 1.5 equiv) was added, immediately followed by an additional 0.1 mL of anhydrous DCM. The reaction was stirred at room temperature for 24 h and then the product was purified by loading directly onto silica gel for flash chromatography (5% to 20% EtOAc/hexanes) to give product (see Table S1 for yields and replicates of reactions performed). As silica gel can also promote formation of the product, it is important to load on to silica gel and purify immediately to avoid any effect on product yield and get accurate comparisons of catalytic activity. Spectral data are consistent with literature data.<sup>10</sup> Solution phase reactions were performed with two or more replicates and an average of the yields was reported (Table S1).<sup>11</sup> Spectral data for **9**: <sup>1</sup>H NMR (400 MHz, CDCl<sub>3</sub>)  $\delta$  7.98 (s, 1H), 7.42 (d, *J* = 8.0 Hz, 1H), 7.14-7.28 (m, 7H), 7.05 (ddd, *J* = 8.0, 7.1, 1.0 Hz, 1H), 6.91 (d, *J* = 2.5 Hz, 1H), 5.15 (t, *J* = 8.0 Hz, 1H), 5.00 (dd, *J* = 12.5, 8.0 Hz, 1H), 4.88 (dd, *J* = 12.5, 8.0 Hz, 1H); <sup>13</sup>C NMR (100 MHz, CDCl<sub>3</sub>)  $\delta$  139.5, 136.7, 129.2, 128.0, 127.8, 126.3, 122.9, 121.9, 120.2, 119.2, 114.5, 111.7, 79.8, 41.8.

**Table S1.** Yields with standard deviation for indole addition to *trans*- $\beta$ -nitrostyrene (**Table 1**)

| entry | catalyst                            | replicates | yield in DCM (%) | average yield with std dev (%) |
|-------|-------------------------------------|------------|------------------|--------------------------------|
| 1     | none                                | 2          | 12, 8            | 10.0 $\pm$ 2.0                 |
| 2     | Ph <sub>3</sub> SiOH                | 3          | 11, 12, 8        | 10.3 $\pm$ 2.1                 |
| 3     | Ph <sub>2</sub> Si(OH) <sub>2</sub> | 3          | 13, 25           | 19.0 $\pm$ 8.5                 |
| 4     | <b>1</b>                            | 4          | 40, 40, 25, 25   | 32.5 $\pm$ 8.7                 |
| 5     | <b>2</b>                            | 2          | 45, 35           | 40.0 $\pm$ 7.1                 |
| 6     | <b>3</b>                            | 2          | 75, 61           | 68.0 $\pm$ 9.9                 |
| 7     | <b>4</b>                            | 2          | 92, 91           | 91.5 $\pm$ 0.7                 |
| 8     | silica gel                          | 2          | 83, 99           | 91 $\pm$ 11.3                  |

Reactions were performed according to the procedure described above and purified directly on silica gel for flash chromatography (5% to 20% EtOAc/hexanes).

<sup>10</sup> Lin, C.; Hsu, J.; Sastry, M. N. V.; Fang, H.; Tu, Z.; Liu, J.-T.; Ching-Fa, Y. *Tetrahedron* **2005**, *61*, 11751-11757.

<sup>11</sup> Ganesh, M.; Seidel, D. *J. Am. Chem. Soc.* **2008**, *130*, 16464-16465.

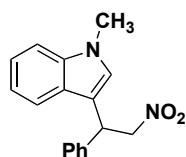

**1-Methyl-3-(2-nitro-1-phenylethyl)-indole.** *trans*- $\beta$ -Nitrostyrene (56 mg, 0.375 mmol, 1 equiv), silanediol **4** (0.075 mmol, 20 mol %), and 0.1 mL of anhydrous DCM was added to a vial containing a stirbar and stirred at room temperature. After 10 min, 1-methylindole (67 mg, 0.563 mmol, 1.5 equiv) was added immediately followed by 0.1 mL of anhydrous DCM. The reaction was stirred at room temperature for 24 h and then the product was purified by loading directly onto silica gel for flash chromatography (5% to 20% EtOAc/Hexanes) to give product in 99% yield. As silica gel can also promote this reaction, it is important to load on to silica gel and purify immediately to avoid any effect on product yield. Spectral data are consistent with literature data.<sup>12</sup> Spectral data: <sup>1</sup>H NMR (400 MHz, CDCl<sub>3</sub>)  $\delta$  7.43 (d, *J* = 8.0 Hz, 1H), 7.18-7.33 (m, 7H), 7.05 (ddd, *J* = 8.0, 6.9, 1.1 Hz, 1H), 6.82 (s, 1H), 5.15 (t, *J* = 8.0 Hz, 1H), 5.00 (dd, *J* = 12.5, 8.0 Hz, 1H), 4.88 (dd, *J* = 12.5, 8.0 Hz, 1H), 3.66 (s, 3H); <sup>13</sup>C NMR (100 MHz, CDCl<sub>3</sub>)  $\delta$  139.7, 137.5, 129.2, 128.0, 127.8, 126.8, 126.6, 122.5, 119.7, 119.2, 113.0, 109.8, 79.8, 41.8, 33.0.

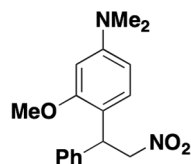

**3-Methoxy-*N,N*-dimethyl-4-(2-nitro-1-phenylethyl)aniline (11).**<sup>13</sup> *trans*- $\beta$ -Nitrostyrene (56 mg, 0.375 mmol, 1 equiv), catalyst (0.075 mmol, 20 mol %), and 0.2 mL of anhydrous DCM were added to a vial containing a stirbar and stirred at room temperature. After 10 min, *N,N*-dimethyl-*m*-anisidine (82  $\mu$ L, 0.563 mmol, 1.5 equiv) was added immediately followed by 0.1 mL of anhydrous DCM. The reaction was stirred at room temperature for either 24 or 48 h and then the product was purified by loading directly onto silica gel for flash chromatography (15% EtOAc/hexanes) to give product (see Table S2 for yields and replicates of reactions performed). Solution phase reactions were performed with two or more replicates and an average of the yields was reported (Table S2). All solution phase yields were an average of two or more replicates. Spectral data are consistent with literature data.<sup>14</sup> <sup>1</sup>H NMR (400 MHz, CDCl<sub>3</sub>):  $\delta$  7.30-7.23 (m, 4H), 7.23-7.16 (m, 1H), 6.85 (d, *J* = 9.2 Hz, 1H), 6.24-6.19 (m, 2H), 5.13 (dd, *J* = 9.2, 7.2 Hz, 1H), 5.00-4.87 (m, 2H), 3.80 (s, 3H), 2.90 (s, 6H); <sup>13</sup>C NMR (100 MHz, CDCl<sub>3</sub>)  $\delta$  157.7, 151.3, 139.8, 129.1, 128.7, 127.9, 127.0, 115.4, 104.6, 96.2, 78.3, 55.3, 43.0, 40.6.

<sup>12</sup> Lin, C.; Hsu, J.; Sastry, M. N. V.; Fang, H.; Tu, Z.; Liu, J.-T.; Ching-Fa, Y. *Tetrahedron* **2005**, 61 (49), 11751-11757.

<sup>13</sup> Dessole, G.; Herrera, R. P.; Ricci, A. *Synlett*. **2004**, 2374-2378.

<sup>14</sup> Takenaka, N.; Sarangthem, R. S.; Seerla, S. K. *Org. Lett.* **2007**, 9, 2819-2822.

**Table S2.** Yields with standard deviation for addition of *N,N*-dimethyl-*m*-anisidine to *trans*- $\beta$ -nitrostyrene (**Table 3**)

| entry | catalyst                            | replicates | yield in DCM (%) | average yield with std. dev. (%) |
|-------|-------------------------------------|------------|------------------|----------------------------------|
| 1     | none                                | 2          | 5, 4             | 4.5 $\pm$ 0.7                    |
| 2     | Ph <sub>3</sub> SiOH                | 2          | 2, 16            | 9.0 $\pm$ 9.9                    |
| 3     | Ph <sub>2</sub> Si(OH) <sub>2</sub> | 2          | 4, 3             | 3.5 $\pm$ 0.7                    |
| 4     | <b>1</b>                            | 3          | 11, 31, 19       | 20.3 $\pm$ 10.1                  |
| 5     | <b>2</b>                            | 2          | 29, 18           | 23.5 $\pm$ 7.8                   |
| 6     | <b>4</b>                            | 2          | 38, 41           | 39.5 $\pm$ 2.1                   |
| 7     | silica gel                          | 2          | 82, 94           | 88.0 $\pm$ 8.5                   |

Reactions were performed according to the procedure described above and purified directly on silica gel using flash chromatography (15% EtOAc/hexanes).

**General Procedure for Solvent-Free Reactions.** *trans*- $\beta$ -Nitrostyrene (56 mg, 0.375 mmol, 1 equiv) and catalyst (0.075 mmol, 20 mol %) were added to a vial containing a stir-bar at room temperature. After stirring for ten minutes, the nucleophile was added to the reaction. The mixture of solids turns into an oil over time as the reaction proceeds. The reaction was stirred for 24 h, at which point it was diluted and purified by loading directly on silica gel for flash chromatography (15% EtOAc/hexanes).

**Table S3.** Yields with standard deviation for the solvent-free indole addition to *trans*- $\beta$ -nitrostyrene (**Table 1**)

| entry | catalyst                            | replicates | solvent free yields (%) | average with std. dev. (%) |
|-------|-------------------------------------|------------|-------------------------|----------------------------|
| 1     | none                                | 1          | 32                      | -                          |
| 2     | Ph <sub>3</sub> SiOH                | 1          | 45                      | -                          |
| 3     | Ph <sub>2</sub> Si(OH) <sub>2</sub> | 1          | 52                      | -                          |
| 4     | <b>1</b>                            | 2          | 75, 54                  | 64.5 $\pm$ 14.8            |
| 5     | <b>2</b>                            | 1          | 73                      | -                          |
| 6     | <b>3</b>                            | 1          | 83                      | -                          |
| 7     | <b>4</b>                            | 1          | 92 (run for 4 h)        | -                          |
| 8     | silica gel                          | 1          | 78                      | -                          |

Reactions were performed according to the procedure described above and purified directly on silica gel using flash chromatography (5% to 20% EtOAc/hexanes).

**Temperature and Concentration Effects on Reaction (Table 2).** *trans*- $\beta$ -Nitrostyrene (56 mg, 0.375 mmol, 1 equiv), silanediol **4** (0.075 mmol, 20 mol %) was added to a vial containing a stirbar. To the mixture was added one-half of the total amount of anhydrous DCM that is needed to obtain the desired concentration and the mixture was stirred at the indicated temperature. After 10 min, indole (67 mg, 0.563 mmol, 1.5 equiv) was added immediately followed by the second half of anhydrous DCM. The reaction was stirred at the indicated temperature for 24 h and then the product was purified by loading directly onto silica gel for flash chromatography (5% to 20% EtOAc/hexanes) to give product in the indicated yield.



### Effects of Water on Reaction and Comparison of Spectra Containing Water or HCl

The route used for the synthesis of silanediols is important to obtain pure, stable silanediols that are effective hydrogen-bonding catalysts. A trace amount of HCl can be produced upon hydrolysis of a silyl chloride, which can be readily removed upon simple workup with  $\text{NaHCO}_3$  or upon column chromatography. The presence of HCl does not provide an accurate assessment of silanediol catalytic activity. Our synthetic route described here utilizes a silane precursor to avoid production of HCl. The presence of HCl can be detected by NMR spectroscopy due to a *sharp* peak at 1.6 ppm (in *d*-chloroform), compared to a *broad* peak with water. The SiOH peak also remains sharp with HCl, but is broad in the presence of water. See Figure S1 for a comparison of spectra. The effect of water and HCl on silanediol catalysis is presented below in Table S4.

**General procedure for additive studies (Table S4).** The procedure for the preparation of 3-(2-nitro-1-phenylethyl)-1*H*-indole (**9**) above was used except water one or more equiv. of water (relative to the nitrostyrene) was added and the reaction mixture was allowed to stir for 15 min *before* the addition of indole for entries 2, 6, and 7. For entries 3 and 4, the procedure for 3-(2-nitro-1-phenylethyl)-1*H*-indole (**9**) above was also used with catalyst **1** pre-treated with HCl as follows: Catalyst **1** (0.075 mmol, 20 mol %) was dissolved in chloroform (1 mL) and allowed to stir in a biphasic mixture with 1.0 M HCl (aq, 0.1 mL) for 0.5 h. At which point, the aqueous layer was removed and the organic phase was concentrated under vacuum and dried *in vacuo* for 4 d (entry 3) or 6 h (entry 4). The NMR spectra of silanediol comparing water and HCl (aq) in  $\text{CDCl}_3$  is shown in Figure S1.

**Table S4.** Yields with standard deviation for indole addition to *trans*- $\beta$ -nitrostyrene with either water or HCl additive.

| entry | catalyst | additive <sup>a</sup>      | yield in DCM (%) |
|-------|----------|----------------------------|------------------|
| 1     | <b>1</b> | none                       | 33               |
| 2     | <b>1</b> | H <sub>2</sub> O (1 equiv) | 35               |
| 3     | <b>1</b> | HCl                        | 65               |
| 4     | <b>1</b> | HCl                        | 99               |
| 5     | <b>4</b> | none                       | 92               |
| 6     | <b>4</b> | H <sub>2</sub> O (1 equiv) | 68               |
| 7     | <b>4</b> | H <sub>2</sub> O (xs)      | 57               |

<sup>a</sup> equivalents relative to nitrostyrene

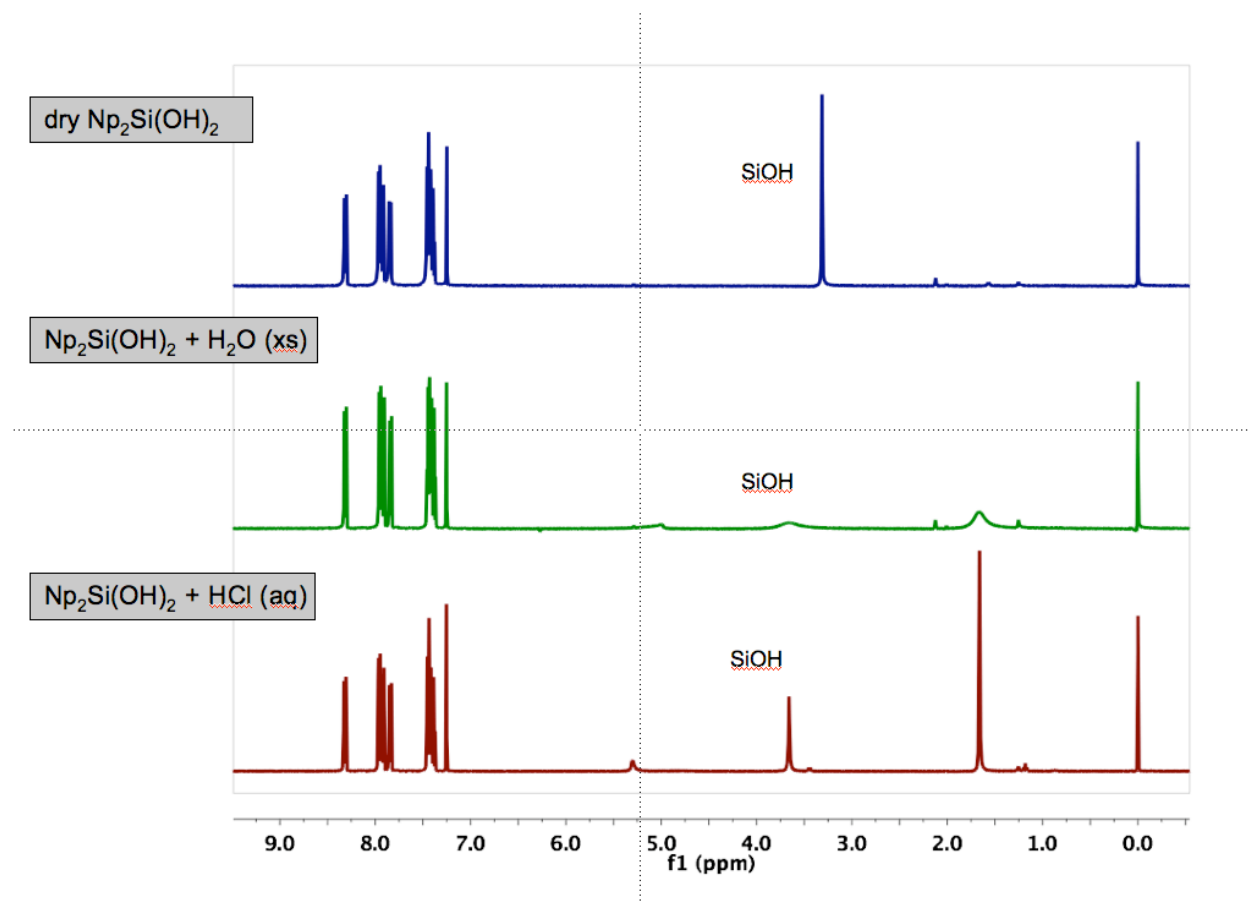

**Figure S1.** Comparison of NMR spectra (in *d*-chloroform, 400 MHz NMR) for di-(1-naphthyl)silanediol (**1**): a) pure and dry silanediol; b) silanediol with H<sub>2</sub>O added; c) silanediol with HCl (aq) added. The SiOH peak is sharp in a pure sample, but becomes broad in the presence of water; the SiOH peak is also sharp when HCl (aq) is added.

#### IV. NMR Studies on Silanols and Silanediols<sup>8,1,15</sup>

NMR binding studies were performed at several silanediol concentrations with several Lewis bases. For each NMR binding study at 0.01 M concentration of silanediol, two stock solutions were each made by dissolving 0.06 mmol of silanediol in 6.0 mL of deuterated solvent (C<sub>6</sub>D<sub>6</sub> or CDCl<sub>3</sub>). A Lewis base (0.30 mmol, 5 equiv) was added to only one of the stock solutions. Then different volumes of each stock solution were mixed to make 0.6 mL of solution with the desired equivalents of Lewis base. The NMR spectrum of each solution was recorded after eight scans at room temperature. The binding constant was determined by fitting a nonlinear curve with Microsoft Excel Solver with the model equation below.<sup>16,17</sup> No constraints

<sup>15</sup> Billo, E. J. *Excel for Chemists: A Comprehensive Guide*, 3<sup>rd</sup> ed.; John Wiley & Sons: New Jersey, 2011, 480-484.

<sup>16</sup> Walsh, S.; Diamond, D. *Talanta*, **1995**, 42, 561-572.

<sup>17</sup> Wilcox, C. S. in *Frontiers in Supramolecular Organic Chemistry and Photochemistry*; Schneider, H.-J.; Durr, H. (Eds.), VCH: Weinheim, Federal Republic of Germany; New York, **1991**, 123-143.

were used, and the only variable being changed/optimized by the Solver is  $K_a$ . There was negligible self-association at 10 mM in  $C_6D_6$  and  $CDCl_3$ .

$$\Delta\delta_i = \delta_{obs,i} - \delta_{free} = \frac{C}{R_0} \Delta\delta$$

where

$$C = \frac{(K_a R_0 + 1 + K_a S_0) \pm \sqrt{(K_a R_0 + 1 + K_a S_0)^2 - 4K_a^2 R_0 S_0}}{2K_a},$$

$\Delta\delta = \delta_{complex} - \delta_{free}$ ;  $\delta_{complex}$  = chemical shift (ppm) of hydroxyl proton in the bound Lewis base (substrate), or the chemical shift where the binding curve levels off and it is estimated by extrapolation of the binding curve;  $\delta_{free}$  = chemical shift of hydroxyl proton of unbound state (e.g. no Lewis base added);  $\Delta\delta_i$  = the observed changed in chemical shift at  $i$  equivalence of Lewis base;  $\delta_{obs,i}$  = chemical shift of hydroxyl proton at  $i$  equivalence of Lewis base;  $R_0$  = initial concentration of silanediol (or receptor) in M;  $S_0$  = initial concentration of Lewis base (or substrate) in M, and  $K_a$  = binding constant in  $M^{-1}$ .

The above steps were repeated for the binding studies at 0.40 M concentration of silanediol, except 40 times as much solutes were used to prepare the stock solutions. Based on the NMR shift data, which indicates that the cyclic dimeric form of silanediol interacts with *trans*- $\beta$ -nitrostyrene at these concentrations, we crudely estimate the binding constant at 0.40 M using the above procedures.

Self-association constants for silanediols were determined based on the procedures outlined for the monomer-dimer equilibrium model in reference 15. The association constant was determined by fitting a nonlinear curve with Microsoft Excel Solver with the model equation below.<sup>18,5</sup> No constraints were used, and the only variables being optimized by the Solver are  $K$  and  $\delta_2$ .

$$\delta_{calc} = \frac{[U]\delta_1 + 2K[U]^2\delta_2}{[U]_T}$$

where  $[U]_T$  is the total concentration of silanediol in  $M^{-1}$ ,  $[U]$  is the concentration in  $M^{-1}$  of the monomer at a given concentration  $[U]_T$  and is estimated by

$$[U] = \frac{\sqrt{8K[U]_T + 1} - 1}{4K},$$

and  $K$  is the association constant in  $M^{-1}$ .  $\delta_1$  is the chemical shift in ppm of the hydroxyl proton of the monomeric form and it is determined at concentration below the level of silanediol self-association (e.g.  $\leq 0.01M$ ).  $\delta_2$  is the chemical shift in ppm of the hydroxyl proton of the dimeric form.

---

<sup>18</sup> Walsh, S.; Diamond, D. *Talanta*, **1995**, 42, 561-572.

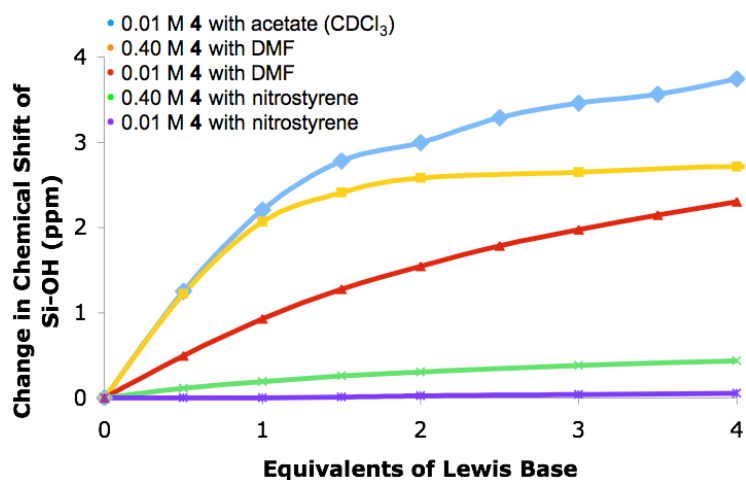

**Figure S2.** Comparison of binding affinity of silanediol **4** to Lewis bases. All binding studies were performed in  $C_6D_6$ , except for  $n\text{-Bu}_4\text{NOAc}$ , which was performed in  $CDCl_3$  due to solubility reasons.

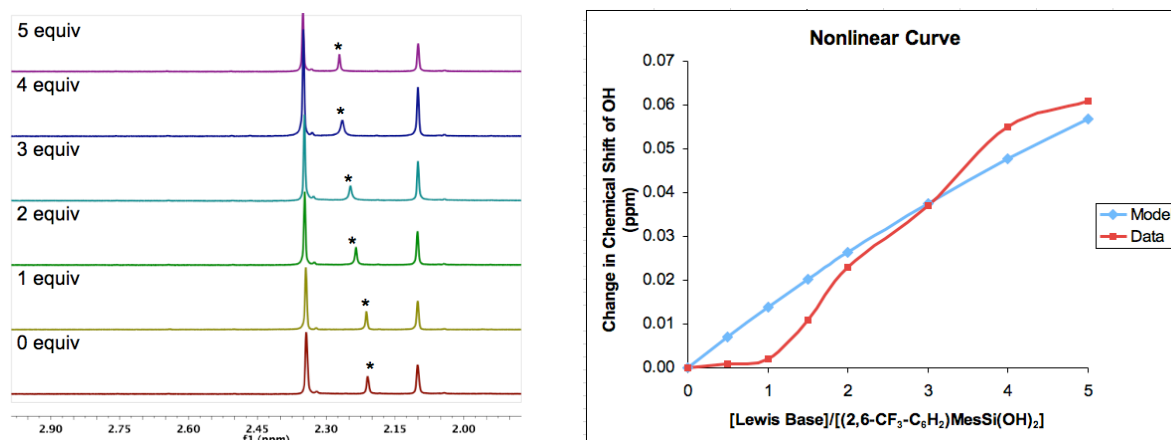

**Figure S3.** Spectra and binding curve for  $(2,6\text{-CF}_3\text{-C}_6\text{H}_2)\text{MesSi(OH)}_2$  **4** as a 10 mM solution in  $C_6D_6$  with *trans*- $\beta$ -nitrostyrene ( $K_a \leq 6.5 \pm 5.2 \text{ M}^{-1}$ ). A shift of 0.06 ppm is observed for hydroxy protons (indicated with \*) when 5.0 equivalents of *trans*- $\beta$ -nitrostyrene are added.

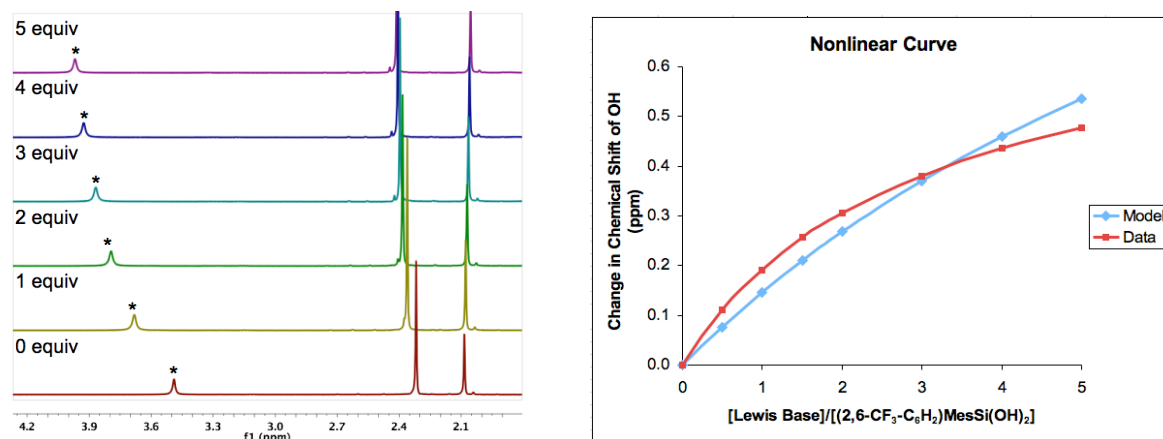

**Figure S4.** Spectra and binding curve for  $(2,6\text{-CF}_3\text{-C}_6\text{H}_2)\text{MesSi(OH)}_2$  (**4**) as a 400 mM solution in  $C_6D_6$  with *trans*- $\beta$ -nitrostyrene ( $K_a = 11.9 \pm 0.1 \text{ M}^{-1}$ ). A shift of 0.48 ppm is observed for hydroxy protons (indicated with \*) when 5.0 equivalents of *trans*- $\beta$ -nitrostyrene are added.

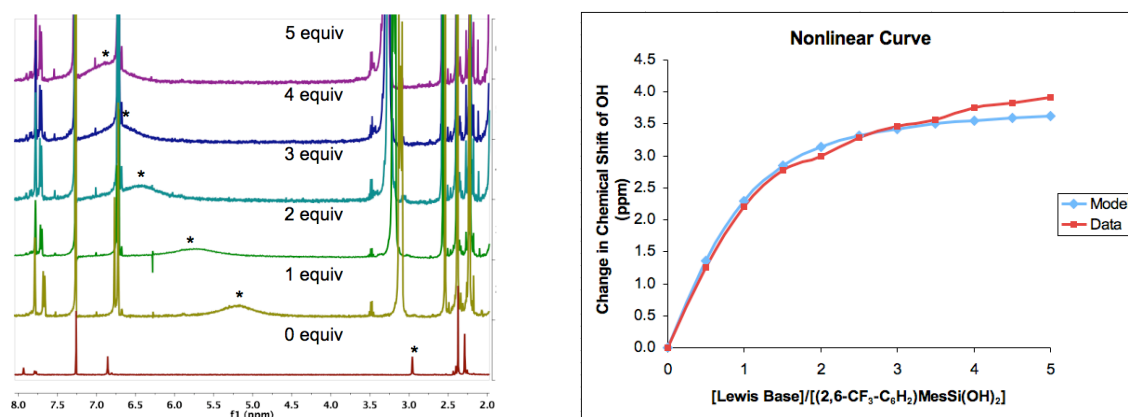

**Figure S5.** Spectra and binding curve for (2,6-CF<sub>3</sub>-C<sub>6</sub>H<sub>2</sub>)MesSi(OH)<sub>2</sub> (4) as a 10 mM solution in CDCl<sub>3</sub> with *n*Bu<sub>4</sub>NOAc ( $K_a = 357.2 \pm 46 \text{ M}^{-1}$ ). A shift of 3.91 ppm is observed for hydroxy protons (indicated with \*) when 5.0 equivalents of *n*Bu<sub>4</sub>NOAc are added.

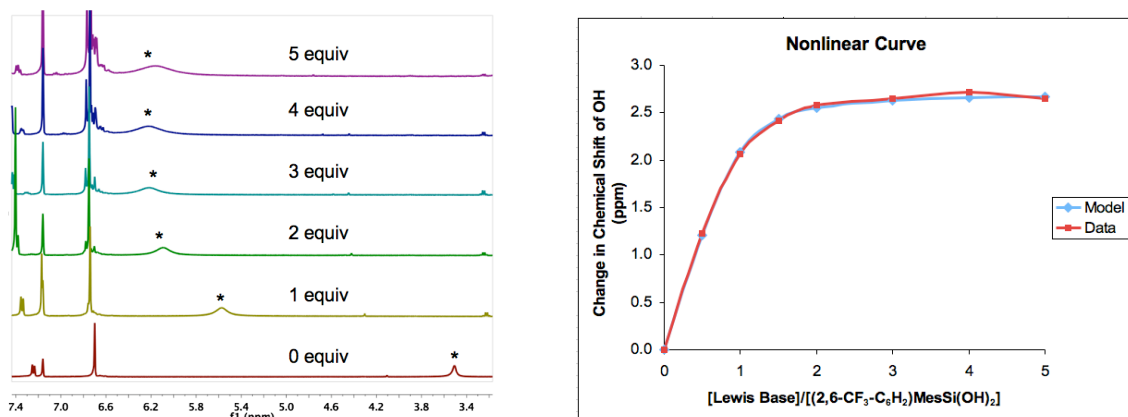

**Figure S6.** Spectra and binding curve for (2,6-CF<sub>3</sub>-C<sub>6</sub>H<sub>2</sub>)MesSi(OH)<sub>2</sub> (4) as a 400 mM solution in C<sub>6</sub>D<sub>6</sub> with DMF ( $K_a = 1434.1 \pm 50 \text{ M}^{-1}$ ). A shift of 2.64 ppm is observed for hydroxy protons (indicated with \*) when 5.0 equivalents of DMF are added.

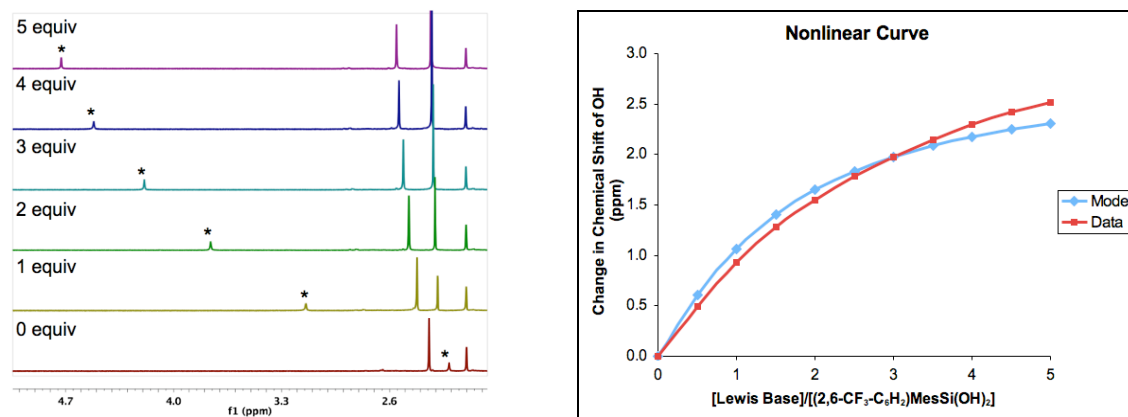

**Figure S7.** Spectra and binding curve for (2,6-CF<sub>3</sub>-C<sub>6</sub>H<sub>2</sub>)MesSi(OH)<sub>2</sub> (4) as a 10 mM solution in C<sub>6</sub>D<sub>6</sub> with DMF ( $K_a = 90.8 \pm 0.4 \text{ M}^{-1}$ ). A shift of 2.51 ppm is observed for hydroxy protons (indicated with \*) when 5.0 equivalents of DMF are added. Figures reproduced from literature (Tran, N. T.; Min, T.; Franz, A. K. *Chem. Eur. J.* **2011**, *17*, 9897-9900) and provided here for comparison and to construct Figure S2.

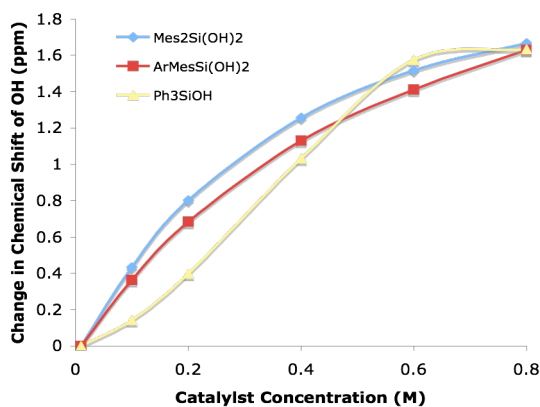

**Figure S8.** Self-association of silanediols and triphenolsilanol. Ar = 2,6-CF<sub>3</sub>-C<sub>6</sub>H<sub>3</sub>. Similar curves were obtained for CDCl<sub>3</sub> and CD<sub>2</sub>Cl<sub>2</sub> except the hydroxy shifts were not as prominent.

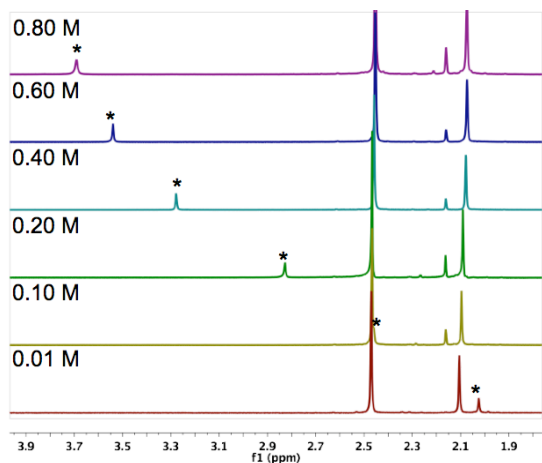

**Figure S9.** Spectra of self-recognition for Mes<sub>2</sub>Si(OH)<sub>2</sub> (**2**) in C<sub>6</sub>D<sub>6</sub> ( $K_a = 7.7 \pm 1.5 \text{ M}^{-1}$ ). A shift of 1.67 ppm is observed for hydroxy protons (indicated with \*) at 0.80 M.

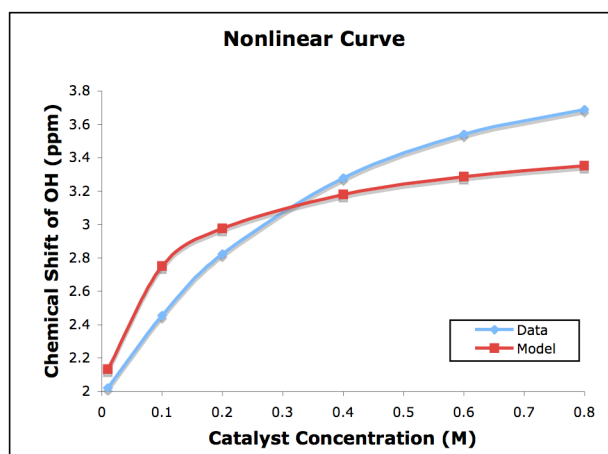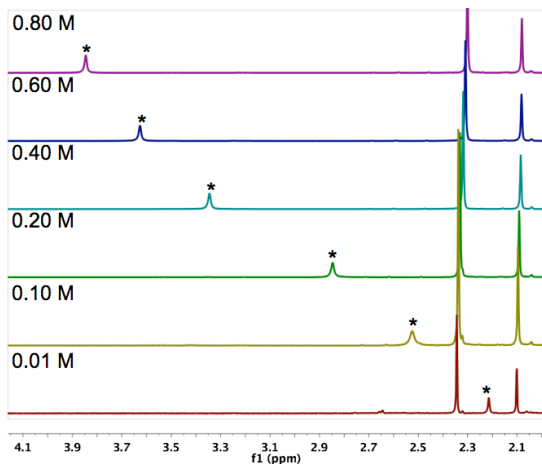

**Figure S10.** Spectra of self-association for (2,6-CF<sub>3</sub>-C<sub>6</sub>H<sub>2</sub>)MesSi(OH)<sub>2</sub> (**4**) in C<sub>6</sub>D<sub>6</sub> ( $K_a = 4.6 \pm 2.4 \text{ M}^{-1}$ ). A shift of 1.63 ppm is observed for hydroxy protons (indicated with \*) at 0.80 M.

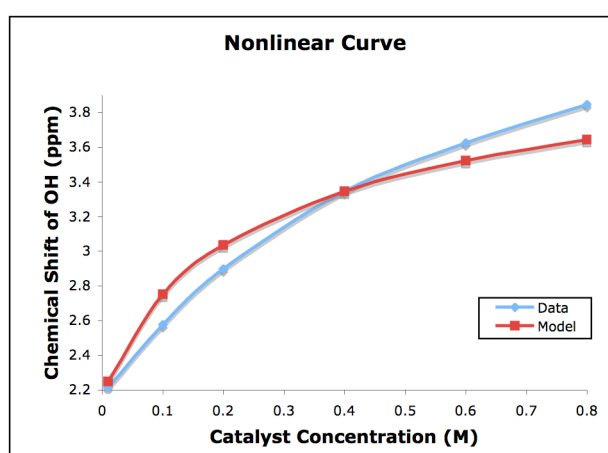

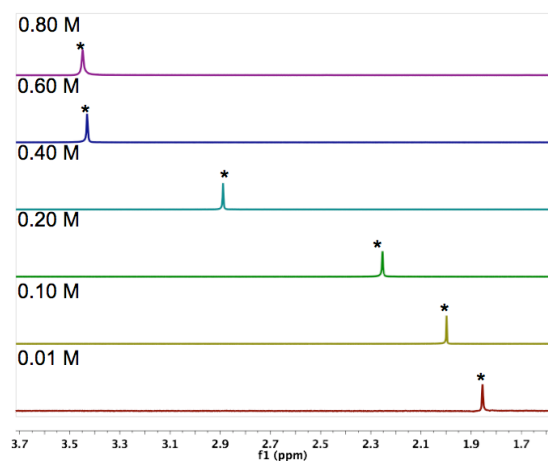

**Figure S11.** Spectra of self-association for  $\text{Ph}_3\text{SiOH}$  in  $\text{C}_6\text{D}_6$ . A shift of 1.59 ppm is observed for hydroxy protons (indicated with \*) at 0.80 M.

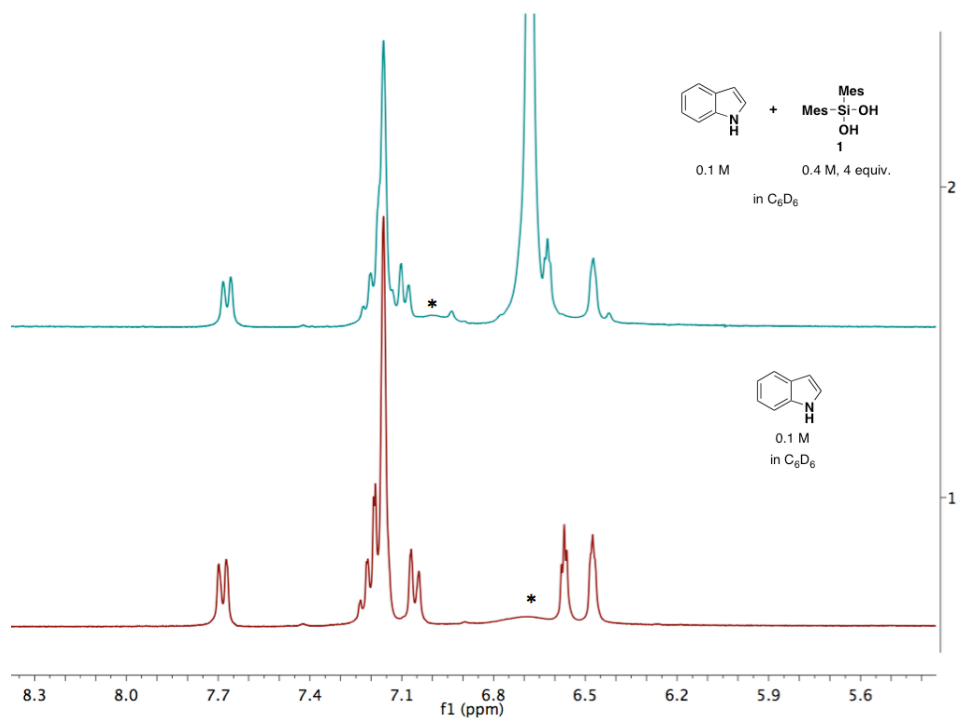

**Figure S12.** Spectra of  $\text{Mes}_2\text{Si}(\text{OH})_2$  (**2**) binding with indole (**8**) in  $\text{C}_6\text{D}_6$ . A shift of 0.30 ppm and broadening is observed for NH protons (indicated with \*).

## V. Preliminary Kinetic Studies

Kinetic studies of hydrogen-bonding catalyst systems in the literature have been used to elucidate reaction mechanisms and improve catalyst design.<sup>19</sup> We hypothesized that the reaction would be second order in catalyst if the cyclic dimer (observed by X-ray and indicated by NMR binding) was the primary active species and only activates nitrostyrene in a 2:1 complex.<sup>20</sup>

Preliminary kinetic studies were performed and setup using the indole addition procedure as described according to the general procedure indicated above. Aliquots (5  $\mu$ L) were removed from the reaction and diluted to 1.5 mL with a 10% *i*PrOH/Hexanes mixture. The progress of the reaction was monitored by concentration of products, determined by HPLC peak height in relation to a calibration curve. <sup>1</sup>H NMR was not used due to high concentrations of reactants and non-ideal separation of diagnostic peaks. The calibration curve was created by diluting 44 mg of silanediol **4** in 25 mL of 10% *i*PrOH/hexanes, and then five other samples were created by consecutive two-fold dilutions. HPLC analysis was performed using a Chiralpak AD-H column, n-hexane/*i*-PrOH = 90:10, 1.0 mL/min,  $t_R$  = 14.8, 16.3 min.

The preliminary data here indicates that the indole addition reaction is first-order (1.36) in catalyst under these conditions. Because the cyclic dimer provides a cluster with two hydrogen-bonding sites, the first-order rates may suggest that the cyclic dimer can activate two molecules of reactant at the current concentration. More detailed kinetic studies are underway.

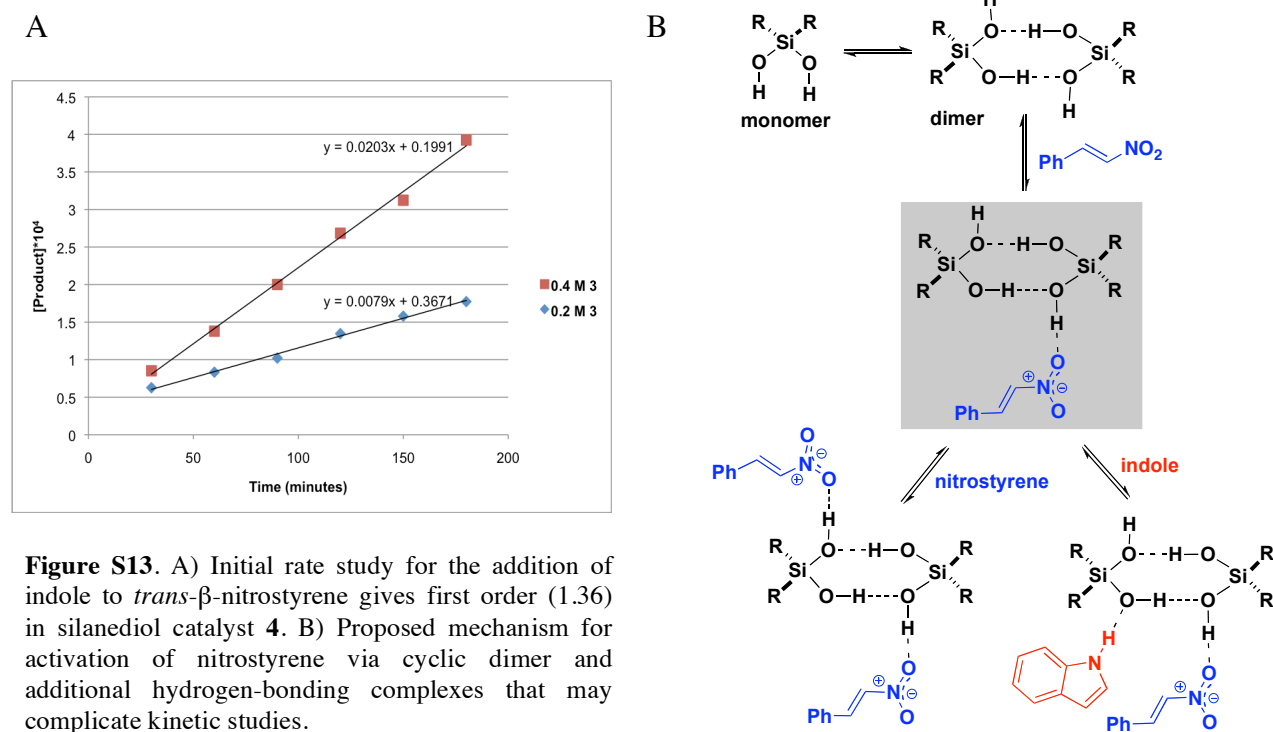

<sup>19</sup> Vachal, P.; Jacobsen, E. N. *J. Am. Chem. Soc.* **2002**, *124* (34), 10012-10014.

<sup>20</sup> (a) Jacobsen, E. N. *Acc. Chem. Res.* **2000**, *33* (6), 421-431; (b) Hansen, K. B.; Leighton, J. L.; Jacobsen, E. N. *J. Am. Chem. Soc.* **1996**, *118* (44), 10924-10925.



## VI. Crystallography Data

The structural data provided here demonstrates that the crystal structure of di-(1-naphthyl)silanediol (**1**) is a linear hydrogen-bonding network (Figure S14) that blocks the free H-bond donor sites from intermolecular interactions with Lewis basic molecules. Due to lower solubility, the silanediol cannot as easily access what is presumed to be a more active cyclic dimer that displays H-bond donors to interact with Lewis bases. This hypothesis partially explains why di-(1-naphthyl)silanediol (**1**) exhibits similar reactivity to the less acidic dimesitylsilanediol, which has similar hydrogen-bonding patterns.<sup>1</sup>

**Crystal Structure Collection and Determination.** Crystals were grown from slow evaporation of silanediol (and one equivalent of Lewis base) from benzene or dichloromethane. Suitable crystals were mounted on glass fibers with silicone grease and placed in the cold N<sub>2</sub> stream of a Bruker SMART Apex II diffractometer with graphite-monochromated Mo K $\alpha$  radiation ( $\lambda$  = 0.71073 Å) at 90(2) K.<sup>21</sup> Reflections were integrated and corrected for Lorentz and polarization effects, and absorption was corrected by using Blessing's method<sup>22</sup> with the program SADABS.<sup>23</sup> Structures were solved by direct methods and refined using all data (based on  $F^2$ ) and the software SHELXTL 6.1.<sup>24,25,26</sup> All non-hydrogen atoms were refined anisotropically. In general, as many hydrogen atoms were located on a difference map as possible and then the missing hydrogen atoms were added geometrically. The position and thermal parameters of hydrogen atoms were allowed to refine freely.

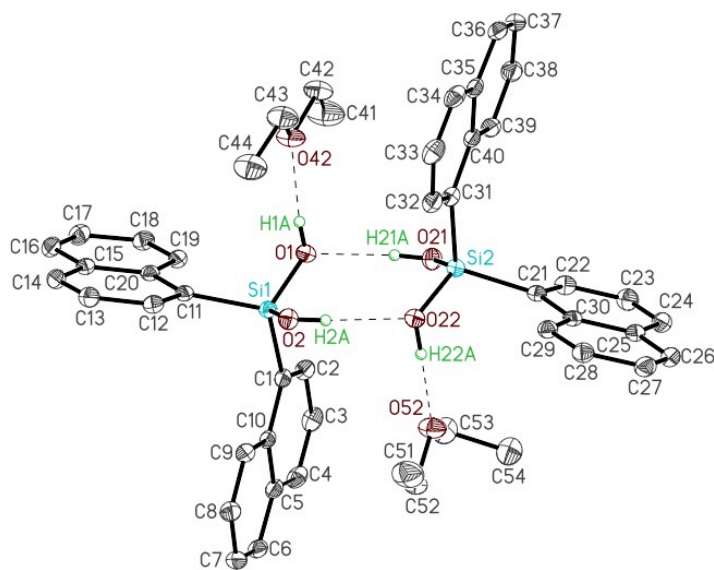

**Figure S14.** Asymmetric unit contains a cyclic dimer cluster supramolecular motif and intermolecular hydrogen bonding with diethyl ether. Selected hydrogens in thermal displacement plot, which shows 35% probability displacement ellipsoids for non-hydrogens, are omitted for clarity.

<sup>21</sup> Bruker (2002). SMART (Version 5.054) and SAINT (Version 7.23a). Bruker AXS Inc., Madison, Wisconsin, USA.

<sup>22</sup> Blessing, R. H. *Acta Cryst.* **1995**, A51, 33.

<sup>23</sup> Sheldrick, G.M., *SADABS*, Version 2.10; Universitat Gottingen: Gottingen, Germany, 2003.

<sup>24</sup> Sheldrick, G. M. *Acta Cryst.* **2008**, A64, 112.

<sup>25</sup> Sheldrick, G. M., **1997**. *SHELXS97* and *SHELXL97*. Universitat Gottingen: Gottingen, Germany.

<sup>26</sup> Sheldrick, G.M., **2002**. *SHELXTL 6.1*. Bruker AXS Inc., Madison, Wisconsin, USA.

**Table S5.** Crystal data and structure refinement for di(1-naphthyl)silanediol (**1**) with diethyl ether solvate.

|                                   |                                                   |                                |
|-----------------------------------|---------------------------------------------------|--------------------------------|
| Identification code               | NT105                                             |                                |
| Empirical formula                 | C <sub>24</sub> H <sub>26</sub> O <sub>3</sub> Si |                                |
| Formula weight                    | 390.54                                            |                                |
| Temperature                       | 90(2) K                                           |                                |
| Wavelength                        | 0.71073 Å                                         |                                |
| Crystal system                    | Triclinic                                         |                                |
| Space group                       | P -1                                              |                                |
| Unit cell dimensions              | a = 8.1046(8) Å                                   | $\alpha = 80.0010(10)^\circ$ . |
|                                   | b = 16.1014(15) Å                                 | $\beta = 82.9910(10)^\circ$ .  |
|                                   | c = 16.2436(16) Å                                 | $\gamma = 83.3600(10)^\circ$ . |
| Volume                            | 2062.2(3) Å <sup>3</sup>                          |                                |
| Z                                 | 4                                                 |                                |
| Density (calculated)              | 1.258 Mg/m <sup>3</sup>                           |                                |
| Absorption coefficient            | 0.136 mm <sup>-1</sup>                            |                                |
| F(000)                            | 832                                               |                                |
| Crystal size                      | 0.33 x 0.30 x 0.25 mm <sup>3</sup>                |                                |
| Crystal color and habit           | colorless block                                   |                                |
| Diffractometer                    | Bruker SMART 1000                                 |                                |
| Theta range for data collection   | 2.96 to 27.51°.                                   |                                |
| Index ranges                      | -10 ≤ h ≤ 10, -20 ≤ k ≤ 20, -20 ≤ l ≤ 21          |                                |
| Reflections collected             | 19660                                             |                                |
| Independent reflections           | 9180 [R(int) = 0.0313]                            |                                |
| Observed reflections (I > 2σ(I))  | 7432                                              |                                |
| Completeness to theta = 27.51°    | 96.7 %                                            |                                |
| Absorption correction             | Semi-empirical from equivalents                   |                                |
| Max. and min. transmission        | 0.9667 and 0.9570                                 |                                |
| Solution method                   | SHELXS-97 (Sheldrick, 2008)                       |                                |
| Refinement method                 | SHELXL-97 (Sheldrick, 2008)                       |                                |
| Data / restraints / parameters    | 9180 / 0 / 713                                    |                                |
| Goodness-of-fit on F <sup>2</sup> | 1.023                                             |                                |
| Final R indices [I > 2σ(I)]       | R1 = 0.0378, wR2 = 0.0985                         |                                |
| R indices (all data)              | R1 = 0.0497, wR2 = 0.1078                         |                                |
| Largest diff. peak and hole       | 0.437 and -0.311 e.Å <sup>-3</sup>                |                                |

**Table S6.** Hydrogen bonds for NT105 [Å and °].

| D-H...A              | d(D-H)  | d(H...A) | d(D...A)   | <(DHA)    |
|----------------------|---------|----------|------------|-----------|
| O(21)-H(21A)...O(1)  | 0.83(2) | 1.95(2)  | 2.7690(15) | 166.7(19) |
| O(2)-H(2A)...O(22)   | 0.83(2) | 1.96(2)  | 2.7754(15) | 167(2)    |
| O(22)-H(22A)...O(52) | 0.84(2) | 1.80(2)  | 2.6310(15) | 174.1(19) |
| O(1)-H(1A)...O(42)   | 0.76(2) | 1.96(2)  | 2.7120(14) | 174(2)    |

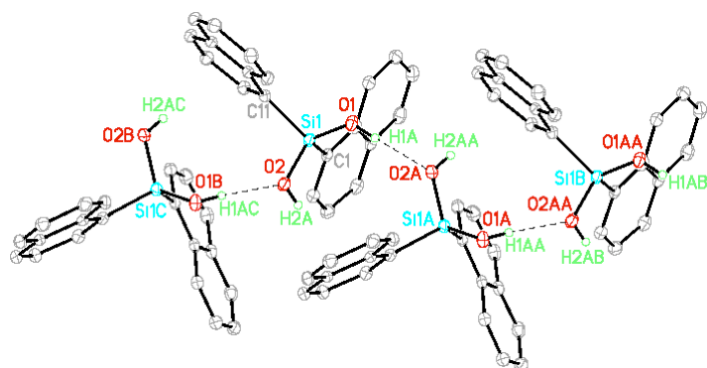

**Figure S15.** Asymmetric unit repeated three times to show polymeric supramolecular assembly and intermolecular hydrogen bonding. Selected hydrogens in ORTEP figure, which shows 35% probability displacement ellipsoids for non-hydrogens, are omitted for clarity.

**Table S7.** Crystal data and structure refinement for di(1-naphthyl)silanediol (**1**).

|                                   |                                                   |                 |
|-----------------------------------|---------------------------------------------------|-----------------|
| Identification code               | NT107                                             |                 |
| Empirical formula                 | C <sub>20</sub> H <sub>16</sub> O <sub>2</sub> Si |                 |
| Formula weight                    | 316.42                                            |                 |
| Temperature                       | 90(2) K                                           |                 |
| Wavelength                        | 0.71073 Å                                         |                 |
| Crystal system                    | Monoclinic                                        |                 |
| Space group                       | P 2 <sub>1</sub> /c                               |                 |
| Unit cell dimensions              | a = 9.389(3) Å                                    | α = 90°.        |
|                                   | b = 19.374(6) Å                                   | β = 93.933(4)°. |
|                                   | c = 8.611(3) Å                                    | γ = 90°.        |
| Volume                            | 1562.8(9) Å <sup>3</sup>                          |                 |
| Z                                 | 4                                                 |                 |
| Density (calculated)              | 1.345 Mg/m <sup>3</sup>                           |                 |
| Absorption coefficient            | 0.157 mm <sup>-1</sup>                            |                 |
| F(000)                            | 664                                               |                 |
| Crystal size                      | 0.47 x 0.16 x 0.09 mm <sup>3</sup>                |                 |
| Crystal color and habit           | colorless plate                                   |                 |
| Diffractometer                    | Bruker SMART 1000                                 |                 |
| Theta range for data collection   | 3.03 to 27.51°.                                   |                 |
| Index ranges                      | -11 ≤ h ≤ 12, -25 ≤ k ≤ 24, -11 ≤ l ≤ 11          |                 |
| Reflections collected             | 14440                                             |                 |
| Independent reflections           | 3538 [R(int) = 0.0412]                            |                 |
| Observed reflections (I > 2σ(I))  | 2672                                              |                 |
| Completeness to theta = 27.51°    | 98.7 %                                            |                 |
| Absorption correction             | Semi-empirical from equivalents                   |                 |
| Max. and min. transmission        | 0.9854 and 0.9290                                 |                 |
| Solution method                   | SHELXS-97 (Sheldrick, 2008)                       |                 |
| Refinement method                 | SHELXL-97 (Sheldrick, 2008)                       |                 |
| Data / restraints / parameters    | 3538 / 0 / 272                                    |                 |
| Goodness-of-fit on F <sup>2</sup> | 1.033                                             |                 |
| Final R indices [I > 2σ(I)]       | R1 = 0.0360, wR2 = 0.0829                         |                 |
| R indices (all data)              | R1 = 0.0585, wR2 = 0.0961                         |                 |
| Largest diff. peak and hole       | 0.332 and -0.310 e.Å <sup>-3</sup>                |                 |

**Table S8.** Hydrogen bonds for NT107 [Å and °].

| D-H...A             | d(D-H)  | d(H...A) | d(D...A)   | <(DHA) |
|---------------------|---------|----------|------------|--------|
| O(1)-H(1A)...O(2)#1 | 0.81(3) | 2.00(3)  | 2.8070(19) | 171(2) |

Symmetry transformations used to generate equivalent atoms:

#1 x, -y+3/2, z+1/2

## VII. Computational Studies of Silanol Acidity<sup>1,27</sup>

### A. Description of Gas-phase Acidity ( $\Delta H_{\text{acid}}$ )

All calculations were conducted using *Gaussian03* programs. The geometry of each species in equation (1) was optimized with the B3LYP/6-31+G(d) method. The deprotonated forms of the acid (HA) and H<sub>2</sub>O were used as the initial guesses for the geometry optimizations of their conjugate bases (e.g. A<sup>-</sup> and OH<sup>-</sup>). The initial guesses for [A<sup>-</sup>⋯H<sub>2</sub>O] and [HO<sup>-</sup>⋯H<sub>2</sub>O] complexes involve adding one H<sub>2</sub>O molecule to each optimized geometry of a conjugate base such that the hydrogen of H<sub>2</sub>O faces and is at approximately 1.63 Å away from the negatively charged atom (the deprotonated atom of the acid). To confirm that an optimized geometry is a real minimum on the potential energy surface, frequency calculation using B3LYP/6-31+G(d) was conducted to ensure that there is no imaginary frequency. Zero-point vibrational corrections were obtained as unscaled frequencies. Gas-phase acidity was determined from the free energies obtained at the B3LYP/6-31+G(d) level and equation (2). All gas-phase calculations correspond to the reference state, 1 atm and 298 K.

### B. Description of $pK_a$ <sup>1,26</sup>

Since gas-phase geometries usually do not change significantly upon solvation, the optimized gas-phase geometries from above were used for all solution-phase calculations. Single-point solution-phase free energies of HA, H<sub>2</sub>O, [A<sup>-</sup>⋯H<sub>2</sub>O] and [HO<sup>-</sup>⋯H<sub>2</sub>O] were determined by using the HF/6-31+G(d,p) method and PCM solvation model that has the following modified parameters: TSARE = 0.4, radii = bondi, and alpha = 1.00. These free energies correspond to the reference state, 1 mol/L and 298 K.

The  $pK_a$  values for a series of reference acids, including three silanols, were determined using a semi-empirical method. First,  $\Delta G_{\text{exchange}}$  was calculated from the solution-phase Gibbs free energies from above and equation (1). Then,  $\Delta G_{\text{exchange}}$  was used in equation (3) to determine computational  $pK_a$ (B3LYP). The least squares linear regression equation (4a) was obtained by using Microsoft Excel to make a graph of  $pK_a$ (B3LYP) versus experimental  $pK_a$  (see Figure S25). Since there were several large deviations from the linear regression equation (see Figure S25 and Table S1),  $pK_a$  values were also calculated using only electronic energies. By computing  $\Delta H_{\text{exchange}}$  and using  $\Delta H_{\text{exchange}}$  in place of  $\Delta G_{\text{exchange}}$  in the above steps, we identified that there was a better correlation with electronic energies (see least squares linear regression equation in Figure S26 and Table S1). Using the latter method, we calculated  $pK_a$  values for unknown silanols in Table 1, (Figures S25 and S26 and Table S1).

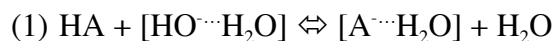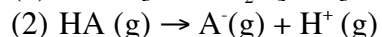

$$(3) pK_a(\text{B3LYP}) = 15.1 - \Delta G_{\text{exchange}} / (2.303 \cdot 298.15 \cdot 1.9858775 \cdot 1000)$$

(4) linear regression equations

$$\text{a. } pK_a(\text{EXP}) = pK_a(\text{B3LYP}) \cdot 2.315 - 16.891 \text{ for } \Delta G_{\text{exchange}}$$

$$\text{b. } pK_a(\text{EXP}) = pK_a(\text{B3LYP}) \cdot 0.4911 + 7.2871 \text{ for } \Delta H_{\text{exchange}}$$

<sup>27</sup> Fu, Y.; Liu, L.; Li, R.-Q.; Liu, R.; Guo, Q.-X. *J. Am. Chem. Soc.* **2004**, *126*, 814-822.

## Di-(1-naphthyl)silanediol

B3LYP/6-31+G(d)

HF = -1211.870486 hartrees (-760460.84866986 kcal/mol)

Imaginary Frequencies: none found

Zero-point correction = 0.304829 (Hartree/Particle)

Sum of electronic and zero-point Energies =

-1211.565657 hartrees (-760269.56542407 kcal/mol)

Sum of electronic and thermal Free Energies =

-1211.614193 hartrees (-760300.02224943 kcal/mol)

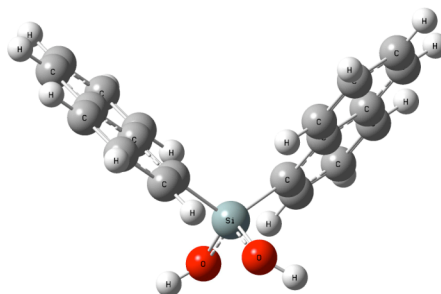

HF/6-31+G(d,p)//B3LYP/6-31+G(d)

HF = -1205.5562811 hartrees (-756498.621953061 kcal/mol)

Zero-point correction = 0.323388 (Hartree/Particle)

Sum of electronic and zero-point Energies = -1205.232893 hartrees (-756295.69268643 kcal/mol)

Sum of electronic and thermal Free Energies = -1205.276672 hartrees (-756323.16444672 kcal/mol)

| Center<br>Number | Atomic<br>Number | Coordinates (Angstroms) |           |           |
|------------------|------------------|-------------------------|-----------|-----------|
|                  |                  | X                       | Y         | Z         |
| 1                | 14               | 0.000215                | -0.015405 | 1.736585  |
| 2                | 8                | -0.374910               | -1.357447 | 2.663895  |
| 3                | 8                | 0.374785                | 1.308907  | 2.689298  |
| 4                | 6                | -1.506319               | 0.568249  | 0.772857  |
| 5                | 6                | -1.978082               | 1.855670  | 1.000301  |
| 6                | 6                | -3.118043               | 2.365314  | 0.331689  |
| 7                | 6                | -3.792741               | 1.581375  | -0.575788 |
| 8                | 6                | -3.360084               | 0.255932  | -0.852791 |
| 9                | 6                | -4.050830               | -0.563072 | -1.788205 |
| 10               | 6                | -3.630104               | -1.847790 | -2.053144 |
| 11               | 6                | -2.493335               | -2.366700 | -1.387373 |
| 12               | 6                | -1.803139               | -1.596356 | -0.474835 |
| 13               | 6                | -2.205016               | -0.263126 | -0.173022 |
| 14               | 6                | 1.507258                | -0.581165 | 0.762954  |
| 15               | 6                | 1.981560                | -1.871017 | 0.970646  |
| 16               | 6                | 3.122643                | -2.368052 | 0.294512  |
| 17               | 6                | 3.796005                | -1.568881 | -0.600569 |
| 18               | 6                | 3.360673                | -0.240255 | -0.857382 |
| 19               | 6                | 4.049980                | 0.594355  | -1.779972 |
| 20               | 6                | 3.626588                | 1.882051  | -2.025504 |
| 21               | 6                | 2.488421                | 2.388289  | -1.352417 |
| 22               | 6                | 1.799614                | 1.602693  | -0.451914 |
| 23               | 6                | 2.204345                | 0.265956  | -0.170083 |
| 24               | 1                | -1.219147               | -1.332364 | 3.136245  |
| 25               | 1                | 1.221855                | 1.277965  | 3.156203  |
| 26               | 1                | -1.461325               | 2.493837  | 1.711514  |
| 27               | 1                | -3.454246               | 3.377949  | 0.540400  |
| 28               | 1                | -4.668551               | 1.964919  | -1.095458 |
| 29               | 1                | -4.922818               | -0.153540 | -2.294078 |
| 30               | 1                | -4.166275               | -2.463647 | -2.770608 |
| 31               | 1                | -2.161227               | -3.380071 | -1.598319 |
| 32               | 1                | -0.935954               | -2.017494 | 0.023797  |
| 33               | 1                | 1.466043                | -2.521078 | 1.671915  |
| 34               | 1                | 3.460838                | -3.383087 | 0.487763  |
| 35               | 1                | 4.672809                | -1.942581 | -1.125706 |
| 36               | 1                | 4.922997                | 0.194384  | -2.291693 |
| 37               | 1                | 4.161629                | 2.509862  | -2.733386 |
| 38               | 1                | 2.154015                | 3.403926  | -1.548293 |
| 39               | 1                | 0.930991                | 2.014190  | 0.052212  |

## Deprotonated Di-(1-naphthyl)silanediol

B3LYP/6-31+G(d)

HF = -1211.3169808 hartrees (-760113.518621808 kcal/mol)

Imaginary Frequencies: none found

Zero-point correction = 0.292099 (Hartree/Particle)

Sum of electronic and zero-point Energies =

-1211.024882 hartrees (-759930.22370382 kcal/mol)

Sum of electronic and thermal Free Energies =

-1211.073049 hartrees (-759960.44897799 kcal/mol)

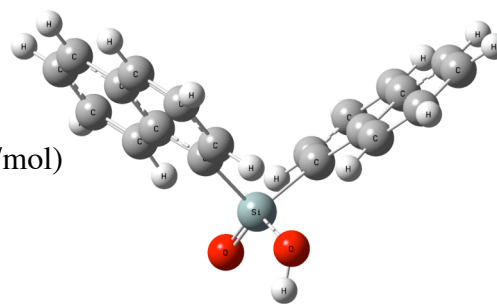

| Center<br>Number | Atomic<br>Number | Coordinates (Angstroms) |           |           |
|------------------|------------------|-------------------------|-----------|-----------|
|                  |                  | X                       | Y         | Z         |
| 1                | 14               | -0.062423               | -0.327166 | 1.769217  |
| 2                | 8                | -0.672270               | -1.557371 | 2.539316  |
| 3                | 8                | 0.638076                | 0.889549  | 2.756678  |
| 4                | 6                | -1.313430               | 0.678453  | 0.691565  |
| 5                | 6                | -1.184040               | 2.056845  | 0.579022  |
| 6                | 6                | -2.025591               | 2.838073  | -0.252879 |
| 7                | 6                | -3.020041               | 2.239717  | -0.994401 |
| 8                | 6                | -3.228137               | 0.835973  | -0.908088 |
| 9                | 6                | -4.264529               | 0.193968  | -1.643211 |
| 10               | 6                | -4.478673               | -1.163375 | -1.530221 |
| 11               | 6                | -3.667537               | -1.935086 | -0.660667 |
| 12               | 6                | -2.651184               | -1.344419 | 0.062618  |
| 13               | 6                | -2.381376               | 0.053099  | -0.047094 |
| 14               | 6                | 1.338424                | -0.856996 | 0.544198  |
| 15               | 6                | 1.317289                | -2.202060 | 0.194679  |
| 16               | 6                | 2.224320                | -2.763485 | -0.738575 |
| 17               | 6                | 3.178550                | -1.974415 | -1.341500 |
| 18               | 6                | 3.272957                | -0.594095 | -1.015530 |
| 19               | 6                | 4.263156                | 0.237327  | -1.611140 |
| 20               | 6                | 4.367047                | 1.571214  | -1.279431 |
| 21               | 6                | 3.482118                | 2.126577  | -0.321995 |
| 22               | 6                | 2.509686                | 1.346412  | 0.270121  |
| 23               | 6                | 2.354217                | -0.033202 | -0.057933 |
| 24               | 1                | 0.493092                | 0.638265  | 3.681105  |
| 25               | 1                | -0.411197               | 2.561573  | 1.153413  |
| 26               | 1                | -1.875979               | 3.915660  | -0.308713 |
| 27               | 1                | -3.663377               | 2.829666  | -1.646676 |
| 28               | 1                | -4.892521               | 0.799537  | -2.296331 |
| 29               | 1                | -5.275996               | -1.640728 | -2.097651 |
| 30               | 1                | -3.856135               | -3.001753 | -0.554329 |
| 31               | 1                | -2.054486               | -1.917682 | 0.769813  |
| 32               | 1                | 0.577469                | -2.842454 | 0.669829  |
| 33               | 1                | 2.159944                | -3.823653 | -0.980071 |
| 34               | 1                | 3.874754                | -2.393180 | -2.067672 |
| 35               | 1                | 4.944552                | -0.204725 | -2.337644 |
| 36               | 1                | 5.129481                | 2.194622  | -1.743178 |
| 37               | 1                | 3.575616                | 3.175299  | -0.046313 |
| 38               | 1                | 1.862904                | 1.769290  | 1.030208  |

## Deprotonated Di-(1-naphthyl)silanediol and Water

B3LYP/6-31+G(d)

HF = -1287.7693317 hartrees (-808088.133335067 kcal/mol)

Imaginary Frequencies: none found

Zero-point correction = 0.317481 (Hartree/Particle)

Sum of electronic and zero-point Energies =

-1287.451851 hartrees (-807888.91102101 kcal/mol)

Sum of electronic and thermal Free Energies =

-1287.503660 hartrees (-807921.4216866 kcal/mol)

HF/6-31+G(d,p)//B3LYP/6-31+G(d)

HF = -1281.1103265 hartrees (-803909.540982015 kcal/mol)

Zero-point correction = 0.337168 (Hartree/Particle)

Sum of electronic and zero-point Energies = -1280.773158 hartrees (-803697.96437658 kcal/mol)

Temperature 298.150 Kelvin. Pressure 1.00000 Atm.

Sum of electronic and thermal Free Energies = -1280.819605 hartrees (-803727.11033355 kcal/mol)

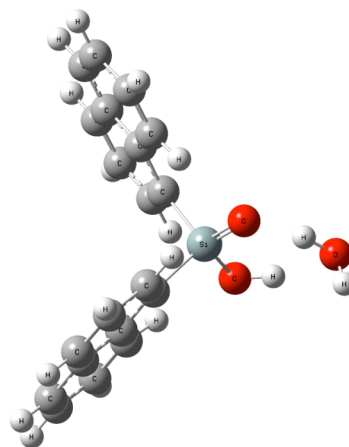

| Center<br>Number | Atomic<br>Number | Coordinates (Angstroms) |           |           |
|------------------|------------------|-------------------------|-----------|-----------|
|                  |                  | X                       | Y         | Z         |
| 1                | 14               | -0.047704               | 1.491606  | -0.243632 |
| 2                | 8                | -0.652821               | 2.629025  | 0.689829  |
| 3                | 8                | 0.634742                | 2.073600  | -1.683880 |
| 4                | 6                | -1.318473               | 0.169048  | -0.829400 |
| 5                | 6                | -1.224796               | -0.341199 | -2.117493 |
| 6                | 6                | -2.077907               | -1.368693 | -2.593677 |
| 7                | 6                | -3.045336               | -1.904803 | -1.773269 |
| 8                | 6                | -3.214295               | -1.412204 | -0.450353 |
| 9                | 6                | -4.221612               | -1.931637 | 0.410910  |
| 10               | 6                | -4.397349               | -1.428271 | 1.682290  |
| 11               | 6                | -3.574803               | -0.368829 | 2.140722  |
| 12               | 6                | -2.586147               | 0.153789  | 1.332104  |
| 13               | 6                | -2.356259               | -0.357022 | 0.019596  |
| 14               | 6                | 1.333591                | 0.505374  | 0.671578  |
| 15               | 6                | 1.309622                | 0.602715  | 2.057417  |
| 16               | 6                | 2.212349                | -0.107945 | 2.887630  |
| 17               | 6                | 3.163934                | -0.933466 | 2.331579  |
| 18               | 6                | 3.259860                | -1.064040 | 0.919242  |
| 19               | 6                | 4.247970                | -1.895877 | 0.321145  |
| 20               | 6                | 4.351976                | -2.005150 | -1.048988 |
| 21               | 6                | 3.469666                | -1.271861 | -1.880737 |
| 22               | 6                | 2.499131                | -0.459472 | -1.330480 |
| 23               | 6                | 2.345312                | -0.331863 | 0.081864  |
| 24               | 1                | 0.492592                | 3.041465  | -1.731577 |
| 25               | 1                | -0.473640               | 0.065005  | -2.790382 |
| 26               | 1                | -1.959355               | -1.736866 | -3.611776 |
| 27               | 1                | -3.697329               | -2.703243 | -2.126052 |
| 28               | 1                | -4.858545               | -2.735327 | 0.042510  |
| 29               | 1                | -5.173003               | -1.834133 | 2.329439  |
| 30               | 1                | -3.733055               | 0.043751  | 3.135240  |
| 31               | 1                | -1.985939               | 0.999025  | 1.660048  |
| 32               | 1                | 0.572838                | 1.258935  | 2.515056  |
| 33               | 1                | 2.146861                | -0.000257 | 3.969374  |
| 34               | 1                | 3.857573                | -1.490938 | 2.960265  |
| 35               | 1                | 4.927746                | -2.445934 | 0.971229  |
| 36               | 1                | 5.112962                | -2.644793 | -1.492321 |
| 37               | 1                | 3.563824                | -1.344116 | -2.962462 |
| 38               | 1                | 1.854107                | 0.128506  | -1.973873 |
| 39               | 1                | -0.442417               | 4.043424  | -0.122302 |

|    |   |           |          |           |
|----|---|-----------|----------|-----------|
| 40 | 8 | -0.134877 | 4.773931 | -0.760747 |
| 41 | 1 | 0.627685  | 5.168992 | -0.313266 |

---



## Bis(trifluoromethyl)silanediol

### B3LYP/6-31+G(d)

HF = -1116.5451776 hartrees (-700643.264395776 kcal/mol)

Imaginary Frequencies: none found

Zero-point correction = 0.056159 (Hartree/Particle)

Sum of electronic and zero-point Energies = -1116.489018 hartrees (-700608.02368518 kcal/mol)

Sum of electronic and thermal Free Energies = -1116.529600 hartrees (-700633.489296 kcal/mol)

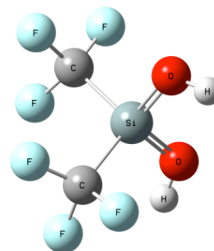

### HF/6-31+G(d,p)//B3LYP/6-31+G(d)

HF = -1112.3343404 hartrees (-698000.921944404 kcal/mol)

Zero-point correction = 0.061092 (Hartree/Particle)

Sum of electronic and thermal Free Energies = -1112.273248 hartrees (-697962.58585248 kcal/mol)

Sum of electronic and thermal Free Energies = -1112.309105 hartrees (-697985.08647855 kcal/mol)

| Center<br>Number | Atomic<br>Number | Coordinates (Angstroms) |           |           |
|------------------|------------------|-------------------------|-----------|-----------|
|                  |                  | X                       | Y         | Z         |
| 1                | 14               | 0.007953                | 0.743844  | -0.003125 |
| 2                | 6                | -1.562615               | -0.397156 | -0.036585 |
| 3                | 6                | 1.588221                | -0.367801 | -0.004131 |
| 4                | 8                | 0.121816                | 1.649044  | -1.355774 |
| 5                | 1                | -0.483600               | 2.387479  | -1.513913 |
| 6                | 8                | -0.080248               | 1.673439  | 1.346532  |
| 7                | 1                | -0.380922               | 1.300488  | 2.188373  |
| 8                | 9                | -1.460710               | -1.461232 | -0.865339 |
| 9                | 9                | -1.844379               | -0.883406 | 1.209290  |
| 10               | 9                | -2.656887               | 0.316269  | -0.431261 |
| 11               | 9                | 1.544758                | -1.244921 | 1.043244  |
| 12               | 9                | 1.727549                | -1.103254 | -1.132661 |
| 13               | 9                | 2.719335                | 0.366332  | 0.142007  |

## Deprotonated Bis(trifluoromethyl)silanediol

### B3LYP/6-31+G(d)

HF = -1116.0267858 hartrees (-700317.968357358 kcal/mol)

Imaginary Frequencies: none found

Zero-point correction = 0.044759 (Hartree/Particle)

Sum of electronic and zero-point Energies = -1115.982027 hartrees (-700289.88176277 kcal/mol)

Sum of electronic and thermal Free Energies = -1116.023167 hartrees (-700315.69752417 kcal/mol)

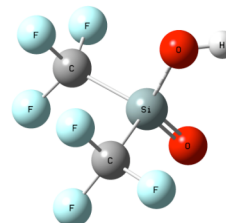

| Center<br>Number | Atomic<br>Number | Coordinates (Angstroms) |           |           |
|------------------|------------------|-------------------------|-----------|-----------|
|                  |                  | X                       | Y         | Z         |
| 1                | 14               | 0.000000                | 0.872062  | -0.140169 |
| 2                | 6                | 1.532358                | -0.361713 | -0.016865 |
| 3                | 6                | -1.532360               | -0.361711 | -0.016866 |
| 4                | 8                | -0.000008               | 1.550132  | 1.407908  |
| 5                | 1                | 0.000033                | 2.515963  | 1.333499  |
| 6                | 8                | 0.000008                | 1.813505  | -1.379033 |
| 7                | 9                | 1.545973                | -1.173908 | 1.093130  |
| 8                | 9                | 1.641188                | -1.217462 | -1.085241 |
| 9                | 9                | 2.725851                | 0.319512  | 0.025463  |
| 10               | 9                | -1.641141               | -1.217513 | -1.085205 |
| 11               | 9                | -1.546017               | -1.173850 | 1.093168  |
| 12               | 9                | -2.725857               | 0.319511  | 0.025380  |

## Deprotonated Bis(trifluoromethyl)silanediol and Water

### B3LYP/6-31+G(d)

HF = -1192.4742608 hartrees (-748289.523394608 kcal/mol)

Imaginary Frequencies: none found

Zero-point correction = 0.068829 (Hartree/Particle)

Sum of electronic and zero-point Energies =

-1192.405432 hartrees (-748246.33263432 kcal/mol)

Sum of electronic and thermal Free Energies =

-1192.453037 hartrees (-748276.20524787 kcal/mol)

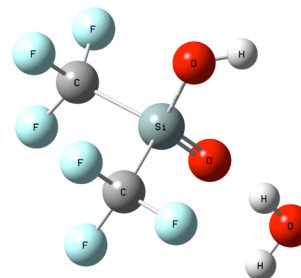

### HF/6-31+G(d,p)//B3LYP/6-31+G(d)

HF = -1187.9220494 hartrees (-745432.965218994 kcal/mol)

Zero-point correction = 0.075114 (Hartree/Particle)

Sum of electronic and zero-point Energies =

-1187.846936 hartrees (-745385.83080936 kcal/mol)

Sum of electronic and thermal Free Energies =

-1187.887245 hartrees (-745411.12510995 kcal/mol)

| Center<br>Number | Atomic<br>Number | Coordinates (Angstroms) |           |           |
|------------------|------------------|-------------------------|-----------|-----------|
|                  |                  | X                       | Y         | Z         |
| 1                | 14               | -0.267093               | -0.034823 | 0.532952  |
| 2                | 6                | 0.571706                | 1.581744  | -0.206928 |
| 3                | 6                | 0.830082                | -1.480856 | -0.220687 |
| 4                | 8                | 0.251001                | 0.002730  | 2.132913  |
| 5                | 1                | -0.505723               | -0.068298 | 2.733518  |
| 6                | 8                | -1.793166               | -0.161335 | 0.247777  |
| 7                | 9                | 1.917686                | 1.703327  | 0.036884  |
| 8                | 9                | 0.440739                | 1.691436  | -1.568342 |
| 9                | 9                | 0.006856                | 2.721250  | 0.308738  |
| 10               | 9                | 0.700875                | -1.615535 | -1.579373 |
| 11               | 9                | 2.180106                | -1.361638 | 0.003151  |
| 12               | 9                | 0.482982                | -2.700527 | 0.304017  |
| 13               | 8                | -4.440798               | -0.300345 | -0.359616 |
| 14               | 1                | -3.494965               | -0.279609 | -0.053301 |
| 15               | 1                | -4.370241               | -0.043100 | -1.290131 |

## Dimethylsilanediol Dimer

### B3LYP/6-31+G(d)

HF = -1042.2112673 hartrees (-653997.992343423 kcal/mol)

Imaginary Frequencies: none found

Zero-point correction = 0.208165 (Hartree/Particle)

Sum of electronic and zero-point Energies =

-1042.003102 hartrees (-653867.36653602 kcal/mol)

Sum of electronic and thermal Free Energies =

-1042.048209 hartrees (-653895.67162959 kcal/mol)

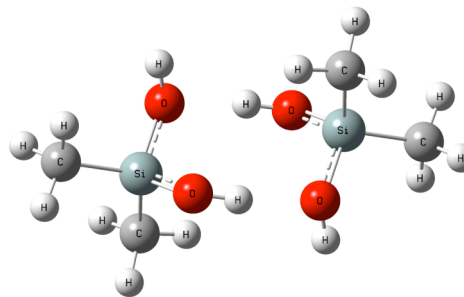

### HF/6-31+G(d,p)//B3LYP/6-31+G(d)

HF = -1038.399553 hartrees (-651606.10350303 kcal/mol)

Imaginary Frequencies: none found

Zero-point correction = 0.220344 (Hartree/Particle)

Sum of electronic and zero-point Energies =

-1038.179209 hartrees (-651467.83543959 kcal/mol)

Sum of electronic and thermal Free Energies =

-1038.219214 hartrees (-651492.93897714 kcal/mol)

| Center<br>Number | Atomic<br>Number | Coordinates (Angstroms) |           |           |
|------------------|------------------|-------------------------|-----------|-----------|
|                  |                  | X                       | Y         | Z         |
| 1                | 14               | 2.164309                | 0.030510  | -0.032354 |
| 2                | 8                | 1.310555                | -0.276554 | 1.412226  |
| 3                | 1                | 1.344684                | -1.187279 | 1.740671  |
| 4                | 8                | 1.371824                | -0.649655 | -1.321042 |
| 5                | 1                | 0.446233                | -0.365682 | -1.482482 |
| 6                | 14               | -2.164318               | -0.030556 | 0.032349  |
| 7                | 8                | -1.310287               | 0.276295  | -1.412129 |
| 8                | 1                | -1.343227               | 1.187323  | -1.739854 |
| 9                | 8                | -1.371791               | 0.649509  | 1.321099  |
| 10               | 1                | -0.446229               | 0.365437  | 1.482587  |
| 11               | 6                | -3.847957               | 0.786730  | -0.032861 |
| 12               | 1                | -4.418622               | 0.563515  | 0.876799  |
| 13               | 1                | -3.756558               | 1.878245  | -0.097135 |
| 14               | 1                | -4.431425               | 0.439347  | -0.893738 |
| 15               | 6                | -2.212709               | -1.902537 | 0.106101  |
| 16               | 1                | -2.662897               | -2.247228 | 1.044759  |
| 17               | 1                | -2.797045               | -2.315914 | -0.724906 |
| 18               | 1                | -1.202445               | -2.324470 | 0.038392  |
| 19               | 6                | 3.848186                | -0.786307 | 0.032616  |
| 20               | 1                | 3.757129                | -1.877860 | 0.096705  |
| 21               | 1                | 4.418712                | -0.562747 | -0.877046 |
| 22               | 1                | 4.431616                | -0.438877 | 0.893504  |
| 23               | 6                | 2.212096                | 1.902527  | -0.106071 |
| 24               | 1                | 2.796765                | 2.316095  | 0.724604  |
| 25               | 1                | 2.661608                | 2.247405  | -1.044985 |
| 26               | 1                | 1.201725                | 2.324116  | -0.037734 |

## Deprotonated Dimethylsilanediol Dimer

B3LYP/6-31+G(d)

HF = -1041.6664898 hartrees (-653656.139014398 kcal/mol)

Imaginary Frequencies: none found

Zero-point correction = 0.195074 (Hartree/Particle)

Sum of electronic and zero-point Energies =

-1041.471416 hartrees (-653533.72825416 kcal/mol)

Sum of electronic and thermal Free Energies =

-1041.516198 hartrees (-653561.82940698 kcal/mol)

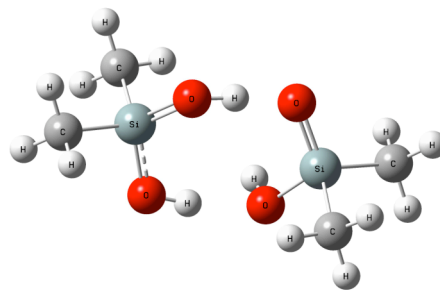

| Center<br>Number | Atomic<br>Number | Coordinates (Angstroms) |           |           |
|------------------|------------------|-------------------------|-----------|-----------|
|                  |                  | X                       | Y         | Z         |
| 1                | 14               | -2.093998               | 0.011017  | -0.121763 |
| 2                | 8                | -1.399935               | 0.285399  | 1.456604  |
| 3                | 1                | -1.194447               | 1.224893  | 1.579857  |
| 4                | 8                | -1.148892               | 0.534022  | -1.288915 |
| 5                | 1                | 0.320971                | -0.040448 | -1.449769 |
| 6                | 14               | 2.100731                | -0.007376 | -0.028306 |
| 7                | 8                | 1.287967                | -0.388133 | -1.405500 |
| 8                | 8                | 1.348424                | -0.509718 | 1.383314  |
| 9                | 1                | 0.383397                | -0.330591 | 1.453996  |
| 10               | 6                | 3.754179                | -0.918711 | -0.051178 |
| 11               | 1                | 4.337399                | -0.712913 | 0.856192  |
| 12               | 1                | 3.584580                | -2.001429 | -0.106487 |
| 13               | 1                | 4.355276                | -0.625585 | -0.921846 |
| 14               | 6                | 2.401029                | 1.865241  | 0.078177  |
| 15               | 1                | 2.907445                | 2.145413  | 1.012173  |
| 16               | 1                | 3.012283                | 2.215358  | -0.765010 |
| 17               | 1                | 1.443504                | 2.400368  | 0.030904  |
| 18               | 6                | -3.790257               | 0.888496  | -0.066891 |
| 19               | 1                | -3.660278               | 1.977547  | 0.007950  |
| 20               | 1                | -4.352996               | 0.694772  | -0.990759 |
| 21               | 1                | -4.403165               | 0.558151  | 0.783760  |
| 22               | 6                | -2.394870               | -1.863712 | -0.037840 |
| 23               | 1                | -2.999793               | -2.148598 | 0.834304  |
| 24               | 1                | -2.911611               | -2.210560 | -0.943197 |
| 25               | 1                | -1.437832               | -2.397797 | 0.021286  |

## Deprotonated Dimethylsilanediol Dimer and Water

### B3LYP/6-31+G(d)

HF = -1118.1155646 hartrees (-701628.697942146 kcal/mol)

Imaginary Frequencies: none found

Zero-point correction = 0.219632 (Hartree/Particle)

Sum of electronic and zero-point Energies =

-1117.895933 hartrees (-701490.87691683 kcal/mol)

Sum of electronic and thermal Free Energies =

-1117.947421 hartrees (-701523.18615171 kcal/mol)

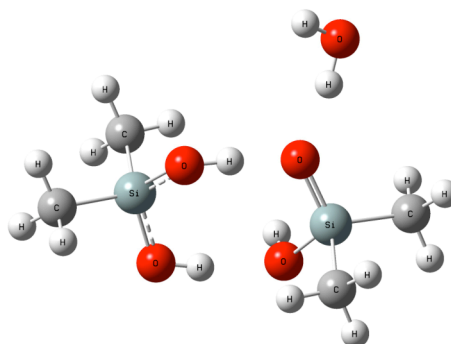

### HF/6-31+G(d,p)//B3LYP/6-31+G(d)

HF = -1113.9596464 hartrees (-699020.817712464 kcal/mol)

Imaginary Frequencies: none found

Zero-point correction = 0.233365 (Hartree/Particle)

Sum of electronic and zero-point Energies =

-1113.726282 hartrees (-698874.37921782 kcal/mol)

Sum of electronic and thermal Free Energies =

-1113.769456 hartrees (-698901.47133456 kcal/mol)

| Center<br>Number | Atomic<br>Number | Coordinates (Angstroms) |           |           |
|------------------|------------------|-------------------------|-----------|-----------|
|                  |                  | X                       | Y         | Z         |
| 1                | 14               | -1.921194               | -0.548522 | -0.012711 |
| 2                | 8                | -1.032835               | -1.518898 | 1.123955  |
| 3                | 1                | -0.914734               | -1.051825 | 1.965339  |
| 4                | 8                | -1.189857               | 0.849291  | -0.276952 |
| 5                | 1                | 0.341103                | 0.840188  | -0.849649 |
| 6                | 14               | 2.270812                | -0.022855 | -0.003454 |
| 7                | 8                | 1.319648                | 0.748452  | -1.108070 |
| 8                | 8                | 1.732370                | -1.554343 | 0.408446  |
| 9                | 1                | 0.775638                | -1.641072 | 0.620074  |
| 10               | 6                | 3.965430                | -0.285531 | -0.787011 |
| 11               | 1                | 4.645466                | -0.808191 | -0.101718 |
| 12               | 1                | 3.868560                | -0.892148 | -1.696086 |
| 13               | 1                | 4.425015                | 0.671393  | -1.066112 |
| 14               | 6                | 2.429952                | 1.016126  | 1.575687  |
| 15               | 1                | 3.024891                | 0.501771  | 2.342689  |
| 16               | 1                | 2.900572                | 1.986560  | 1.367137  |
| 17               | 1                | 1.435265                | 1.220663  | 1.992758  |
| 18               | 6                | -3.661570               | -0.355541 | 0.732669  |
| 19               | 1                | -3.625115               | 0.229316  | 1.662136  |
| 20               | 1                | -4.319840               | 0.186029  | 0.040107  |
| 21               | 1                | -4.122868               | -1.327339 | 0.957090  |
| 22               | 6                | -2.003080               | -1.725814 | -1.495092 |
| 23               | 1                | -2.452809               | -2.692673 | -1.230987 |
| 24               | 1                | -2.594315               | -1.280860 | -2.306560 |
| 25               | 1                | -0.994345               | -1.913213 | -1.884141 |
| 26               | 1                | -1.144762               | 3.808669  | -0.693271 |
| 27               | 8                | -1.928199               | 3.450331  | -0.251264 |
| 28               | 1                | -1.735789               | 2.467905  | -0.218921 |

## Bis(trifluoromethyl)silanediol Dimer

### B3LYP/6-31+G(d)

HF = -2233.1060032 hartrees (-1401296.34806803 kcal/mol)

Imaginary Frequencies: none found

Zero-point correction = 0.115926 (Hartree/Particle)

Sum of electronic and zero-point Energies =

-2232.990077 hartrees (-1401223.60321827 kcal/mol)

Sum of electronic and thermal Free Energies =

-2233.052360 hartrees (-1401262.6864236 kcal/mol)

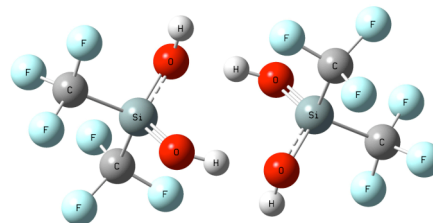

### HF/6-31+G(d,p)//B3LYP/6-31+G(d)

HF = -2224.6623061 hartrees (-1395997.84370081 kcal/mol)

Imaginary Frequencies: none found

Zero-point correction = 0.125870 (Hartree/Particle)

Sum of electronic and zero-point Energies =

-2224.6622874 hartrees (-1395997.83196637 kcal/mol)

Sum of electronic and thermal Free Energies =

-2224.587858 hartrees (-1395951.12677358 kcal/mol)

| Center<br>Number | Atomic<br>Number | Coordinates (Angstroms) |           |           |
|------------------|------------------|-------------------------|-----------|-----------|
|                  |                  | X                       | Y         | Z         |
| 1                | 14               | -2.104954               | -0.103755 | 0.097868  |
| 2                | 8                | -1.207081               | -0.467582 | -1.254526 |
| 3                | 1                | -1.091558               | -1.406618 | -1.477396 |
| 4                | 8                | -1.454633               | -0.554803 | 1.519761  |
| 5                | 1                | -0.511415               | -0.344183 | 1.677699  |
| 6                | 14               | 2.105011                | 0.103852  | -0.097972 |
| 7                | 8                | 1.207078                | 0.468106  | 1.254268  |
| 8                | 1                | 1.091673                | 1.407208  | 1.476923  |
| 9                | 8                | 1.454854                | 0.554706  | -1.520003 |
| 10               | 1                | 0.511518                | 0.344502  | -1.677794 |
| 11               | 6                | 3.825540                | 0.973871  | 0.016642  |
| 12               | 6                | 2.292402                | -1.820834 | 0.011195  |
| 13               | 6                | -3.825334               | -0.974068 | -0.016767 |
| 14               | 6                | -2.292667               | 1.820918  | -0.010949 |
| 15               | 9                | -4.534098               | -0.930826 | 1.131090  |
| 16               | 9                | -3.649797               | -2.290416 | -0.338476 |
| 17               | 9                | -4.596729               | -0.429273 | -0.993686 |
| 18               | 9                | -3.234038               | 2.279233  | 0.849734  |
| 19               | 9                | -2.611207               | 2.274420  | -1.243137 |
| 20               | 9                | -1.110021               | 2.426683  | 0.338902  |
| 21               | 9                | 3.650220                | 2.290321  | 0.338056  |
| 22               | 9                | 4.534407                | 0.930254  | -1.131137 |
| 23               | 9                | 4.596732                | 0.429136  | 0.993753  |
| 24               | 9                | 3.234099                | -2.279398 | -0.849002 |
| 25               | 9                | 2.610331                | -2.274215 | 1.243590  |
| 26               | 9                | 1.109834                | -2.426475 | -0.339100 |

## Deprotonated Bis(trifluoromethyl)silanediol Dimer

B3LYP/6-31+G(d)

HF = -2232.6274072 hartrees (-1400996.02429207 kcal/mol)

Imaginary Frequencies: none found

Zero-point correction = 0.101930 (Hartree/Particle)

Sum of electronic and zero-point Energies =

-2232.525478 hartrees (-1400932.06269978 kcal/mol)

Sum of electronic and thermal Free Energies =

-2232.587069 hartrees (-1400970.71166819 kcal/mol)

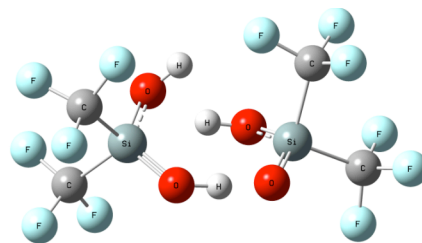

| Center<br>Number | Atomic<br>Number | Coordinates (Angstroms) |           |           |
|------------------|------------------|-------------------------|-----------|-----------|
|                  |                  | X                       | Y         | Z         |
| 1                | 14               | 2.115600                | -0.274635 | 0.106968  |
| 2                | 8                | 1.213024                | -0.359849 | 1.390810  |
| 3                | 8                | 1.655451                | -1.027436 | -1.303349 |
| 4                | 1                | 0.700484                | -0.998391 | -1.484999 |
| 5                | 14               | -2.029593               | -0.049787 | 0.175677  |
| 6                | 8                | -1.156975               | 0.301696  | -1.191704 |
| 7                | 1                | -0.563420               | 1.072920  | -1.159706 |
| 8                | 8                | -1.241360               | -0.157161 | 1.558811  |
| 9                | 1                | -0.161628               | -0.263236 | 1.541794  |
| 10               | 6                | -3.443726               | 1.277537  | 0.360280  |
| 11               | 6                | -2.914084               | -1.702875 | -0.343942 |
| 12               | 6                | 3.929271                | -0.944662 | 0.362442  |
| 13               | 6                | 2.357553                | 1.600722  | -0.435196 |
| 14               | 9                | 4.694471                | -0.937492 | -0.771971 |
| 15               | 9                | 3.945698                | -2.232889 | 0.816358  |
| 16               | 9                | 4.627948                | -0.209968 | 1.284046  |
| 17               | 9                | 3.232014                | 1.811353  | -1.460865 |
| 18               | 9                | 2.736303                | 2.445545  | 0.559850  |
| 19               | 9                | 1.138315                | 2.111272  | -0.897099 |
| 20               | 9                | -2.921054               | 2.542955  | 0.363035  |
| 21               | 9                | -4.162561               | 1.157122  | 1.510086  |
| 22               | 9                | -4.353029               | 1.248499  | -0.661188 |
| 23               | 9                | -3.857511               | -2.091446 | 0.565733  |
| 24               | 9                | -3.554906               | -1.633972 | -1.547287 |
| 25               | 9                | -2.027329               | -2.734504 | -0.444274 |

## Deprotonated Bis(trifluoromethyl)silanediol Dimer and Water

### B3LYP/6-31+G(d)

HF = -2309.0668892 hartrees (-1448962.56364189 kcal/mol)

Imaginary Frequencies: none found

Zero-point correction = 0.127067 (Hartree/Particle)

Sum of electronic and zero-point Energies =

-2308.939822 hartrees (-1448882.82770322 kcal/mol)

Sum of electronic and thermal Free Energies =

-2309.006370 hartrees (-1448924.5872387 kcal/mol)

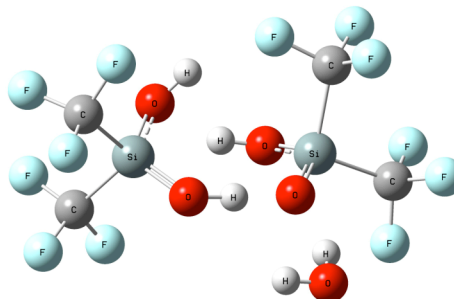

### HF/6-31+G(d,p)//B3LYP/6-31+G(d)

HF = -2300.2593285 hartrees (-1443435.73122703 kcal/mol)

Zero-point correction = 0.582093 (Hartree/Particle)

Sum of electronic and zero-point Energies =

-2300.2592519 hartrees (-1443435.68315977 kcal/mol)

Sum of electronic and thermal Free Energies =

-2299.729484 hartrees (-1443103.24850484 kcal/mol)

| Center<br>Number | Atomic<br>Number | Coordinates (Angstroms) |           |           |
|------------------|------------------|-------------------------|-----------|-----------|
|                  |                  | X                       | Y         | Z         |
| 1                | 14               | 2.075778                | -0.200524 | -0.166576 |
| 2                | 8                | 1.229142                | -0.511937 | 1.128310  |
| 3                | 8                | 1.533640                | -0.705221 | -1.652540 |
| 4                | 1                | 0.575582                | -0.620711 | -1.798718 |
| 5                | 14               | -2.085580               | -0.028504 | 0.015287  |
| 6                | 8                | -1.228786               | 0.564488  | -1.273299 |
| 7                | 1                | -0.647617               | 1.330839  | -1.118230 |
| 8                | 8                | -1.263380               | -0.355939 | 1.351344  |
| 9                | 1                | -0.211007               | -0.441538 | 1.278376  |
| 10               | 6                | -3.511995               | 1.219067  | 0.455322  |
| 11               | 6                | -2.942655               | -1.591324 | -0.758324 |
| 12               | 6                | 3.895618                | -0.892432 | -0.124606 |
| 13               | 6                | 2.276220                | 1.742584  | -0.380434 |
| 14               | 9                | 4.600873                | -0.663909 | -1.273976 |
| 15               | 9                | 3.927223                | -2.241563 | 0.075270  |
| 16               | 9                | 4.636324                | -0.339219 | 0.884158  |
| 17               | 9                | 3.089825                | 2.138812  | -1.399331 |
| 18               | 9                | 2.703492                | 2.404391  | 0.724452  |
| 19               | 9                | 1.028431                | 2.306589  | -0.680228 |
| 20               | 9                | -3.010012               | 2.473675  | 0.666606  |
| 21               | 9                | -4.201728               | 0.884372  | 1.579182  |
| 22               | 9                | -4.439403               | 1.344082  | -0.540611 |
| 23               | 9                | -3.864590               | -2.142435 | 0.085558  |
| 24               | 9                | -3.599465               | -1.335364 | -1.925968 |
| 25               | 9                | -2.035388               | -2.569674 | -1.035511 |
| 26               | 8                | 1.115554                | -1.252412 | 3.865862  |
| 27               | 1                | 1.356794                | -1.019283 | 2.942107  |
| 28               | 1                | 0.150747                | -1.159930 | 3.868936  |



# VIII. $^1\text{H}$ NMR Spectra

$\text{CDCl}_3$ , 600 MHz

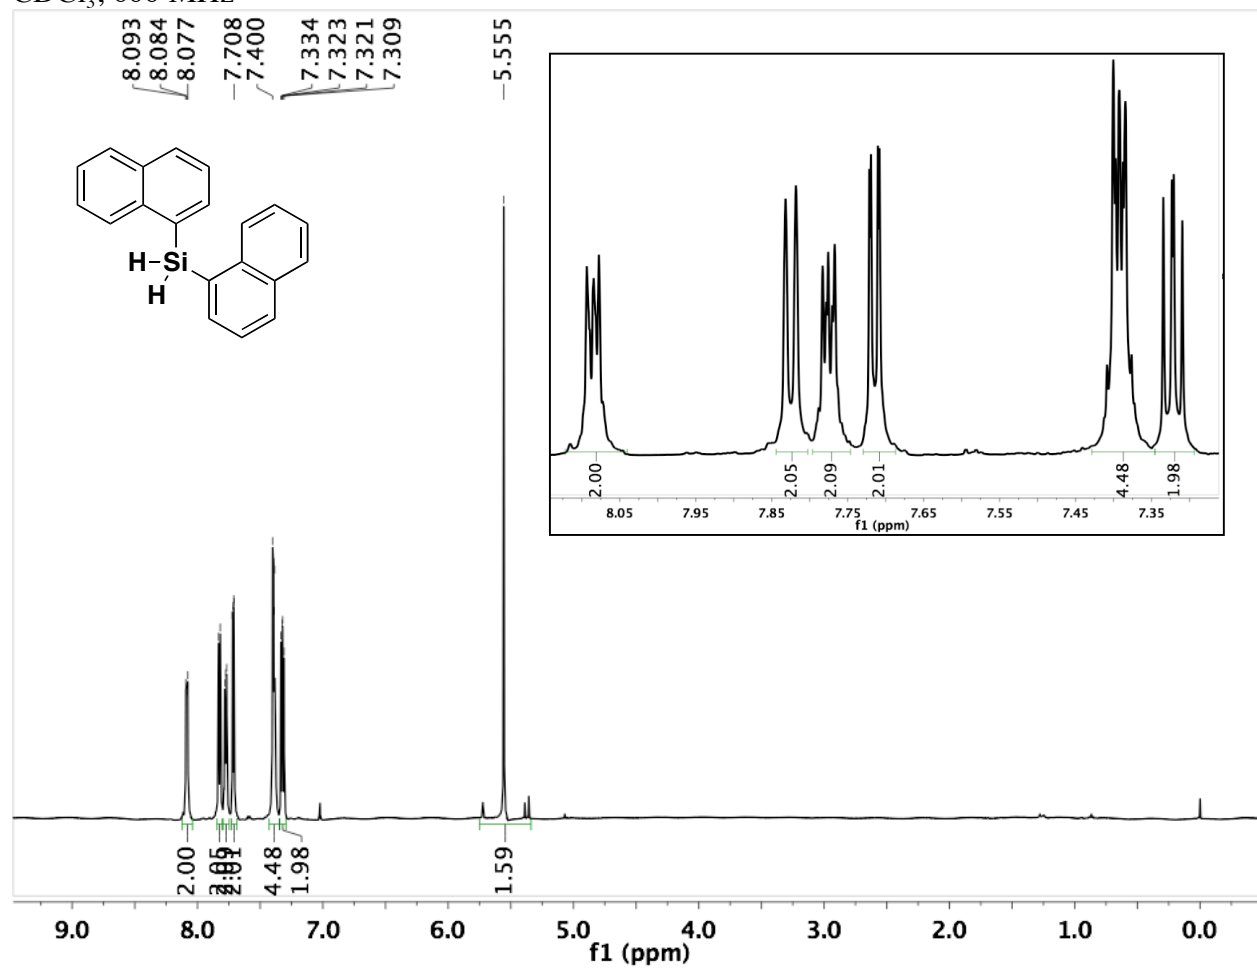

CDCl<sub>3</sub>, 150 MHz

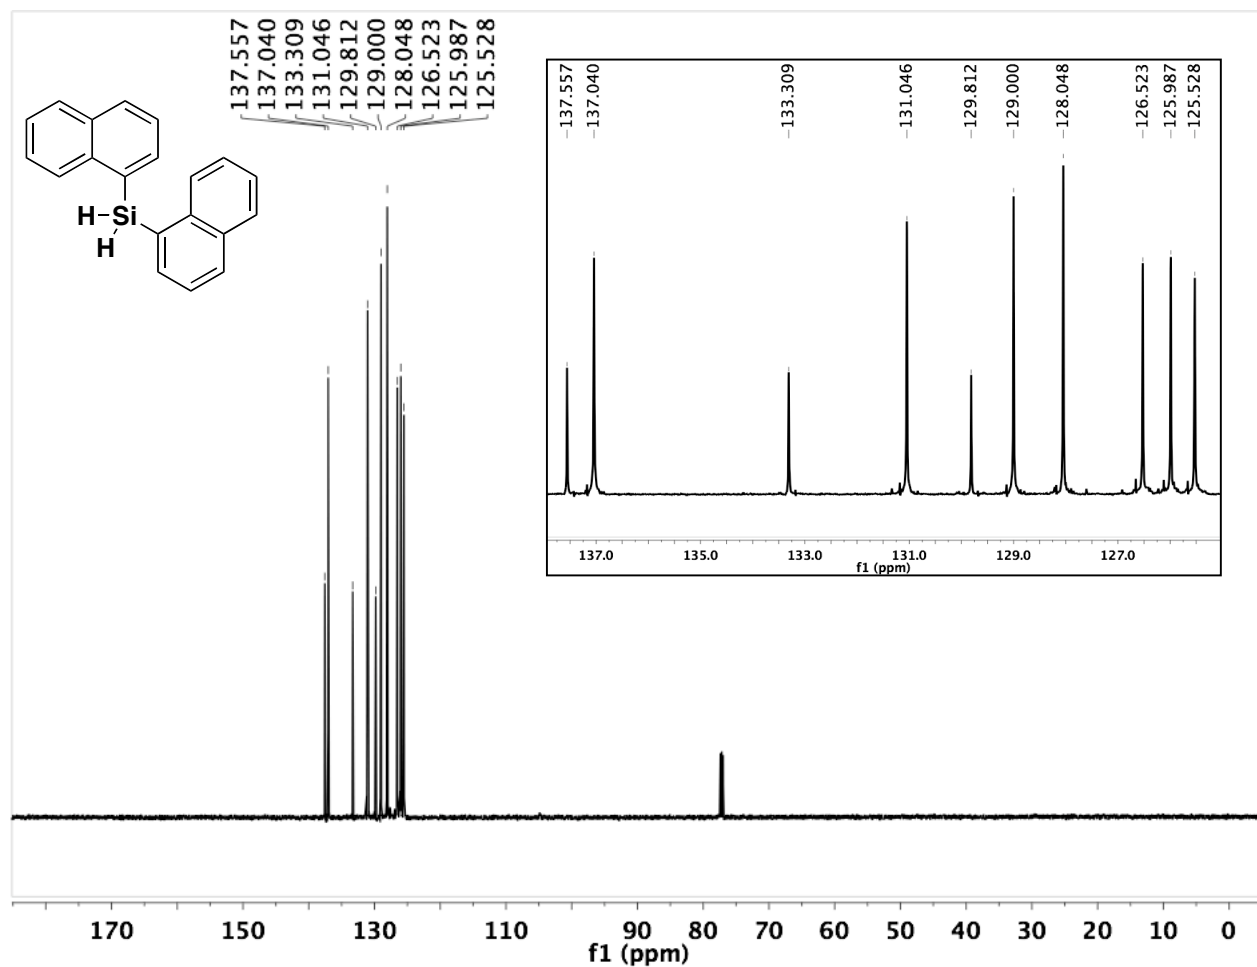

CDCl<sub>3</sub>, 400 MHz

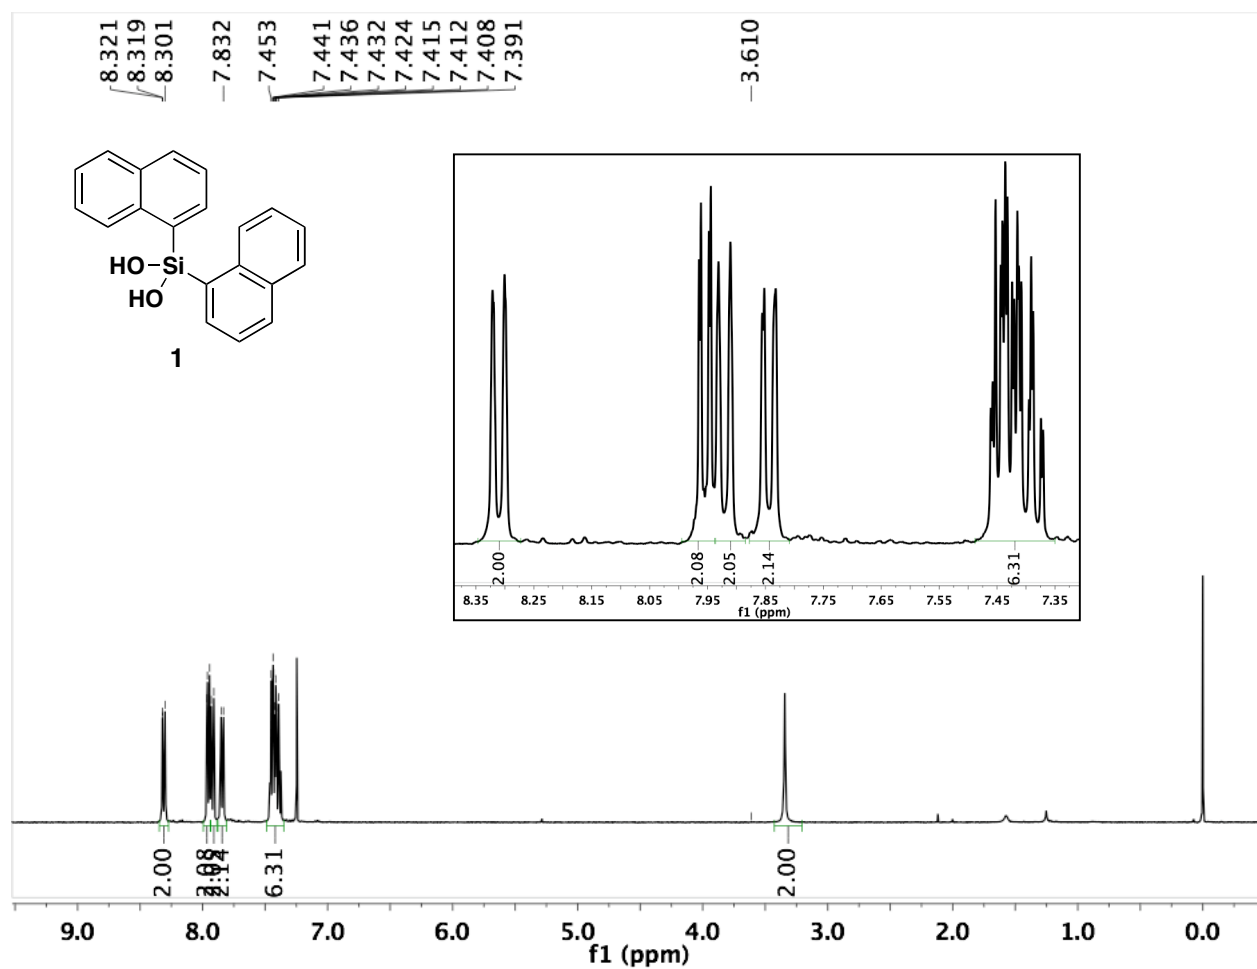

C<sub>6</sub>D<sub>6</sub>, 400 MHz

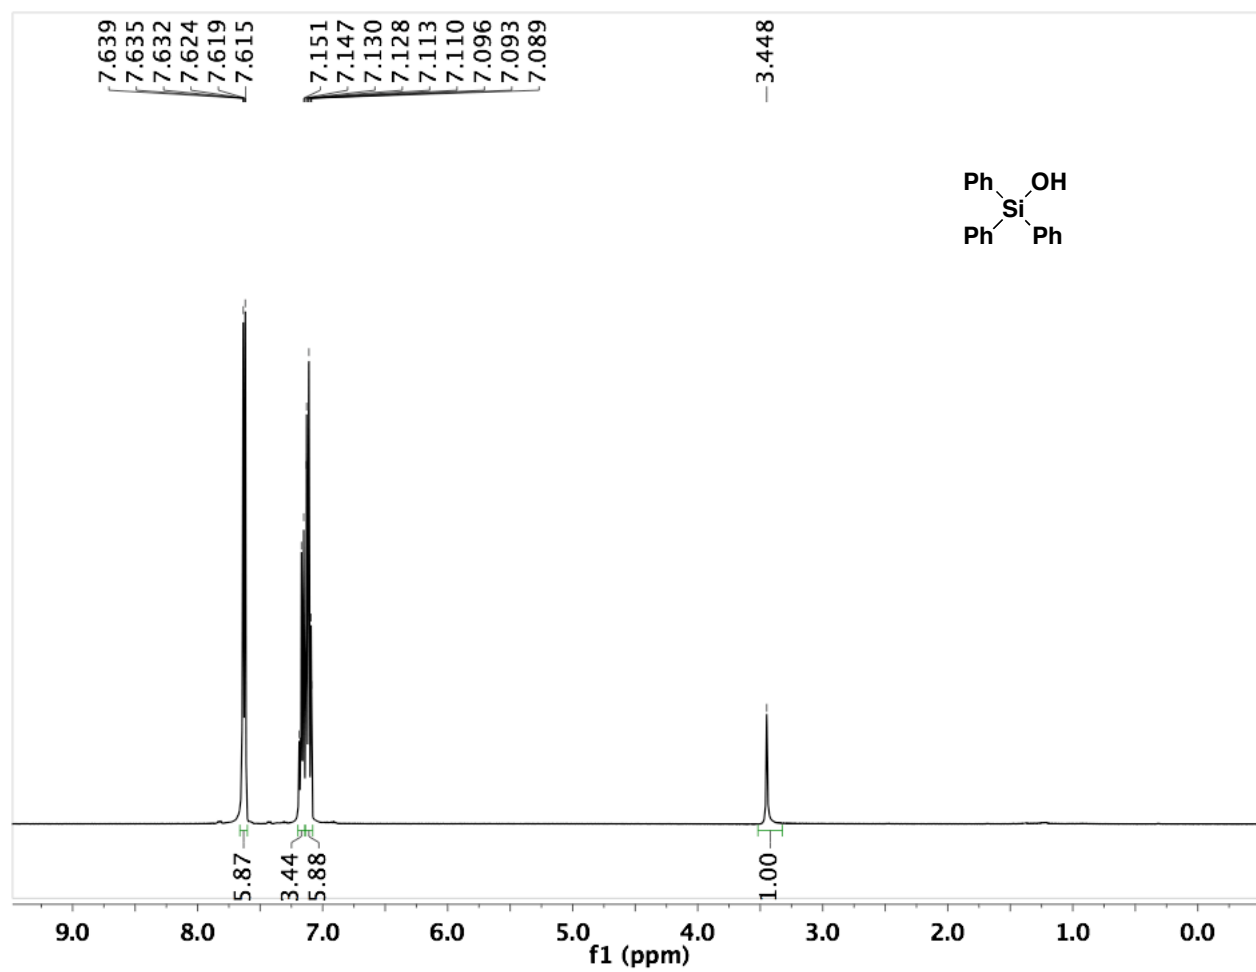

CDCl<sub>3</sub>, 600 MHz

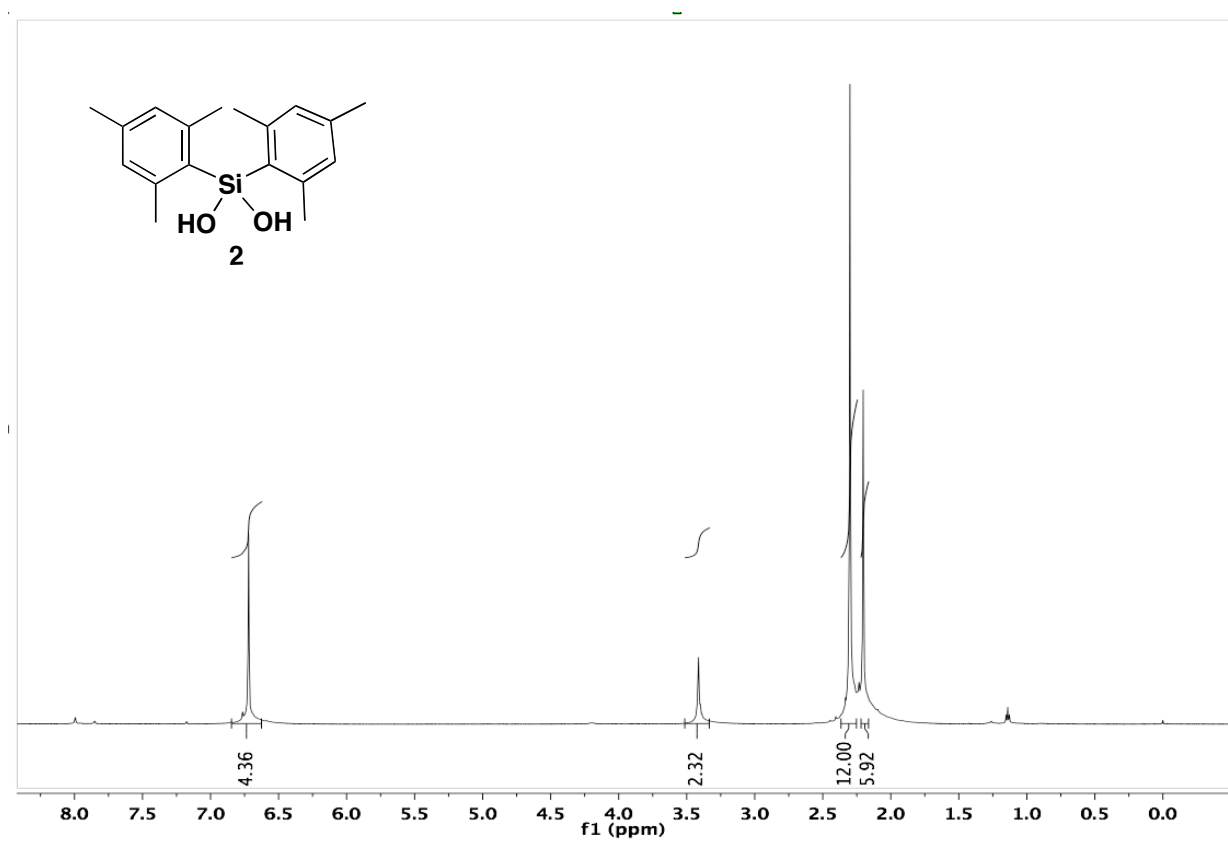

CDCl<sub>3</sub>, 600 MHz

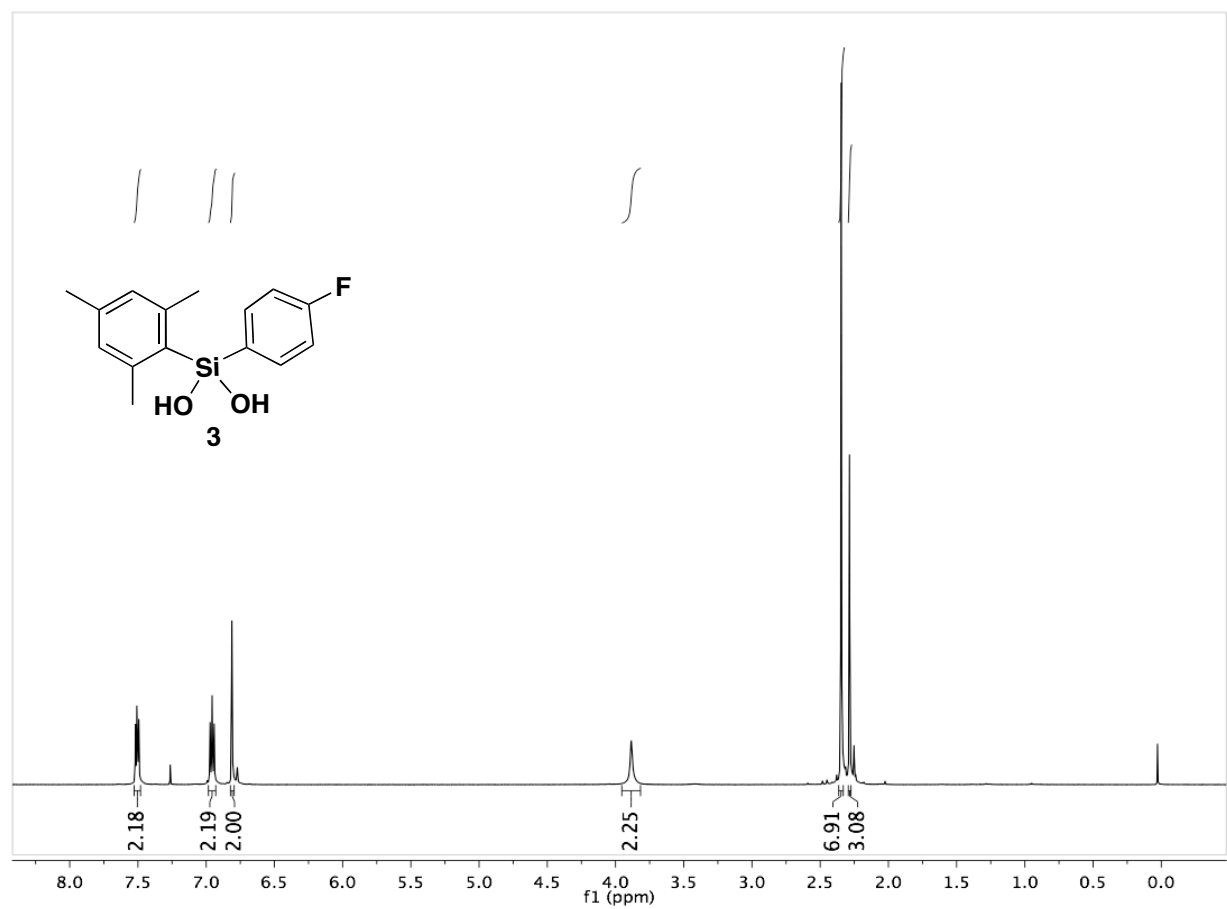

C<sub>6</sub>D<sub>6</sub>, 400 MHz

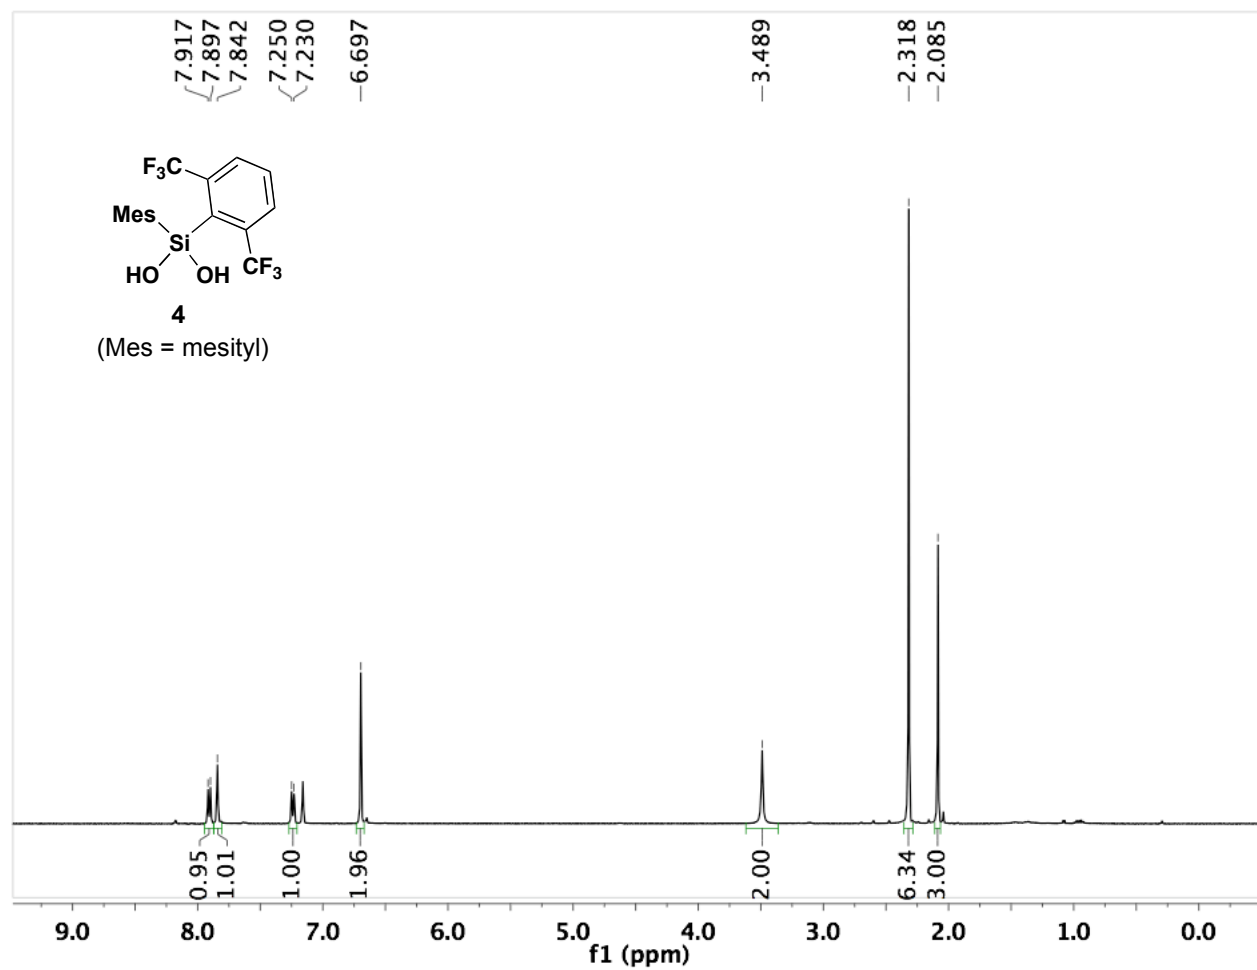

CDCl<sub>3</sub>, 400 MHz

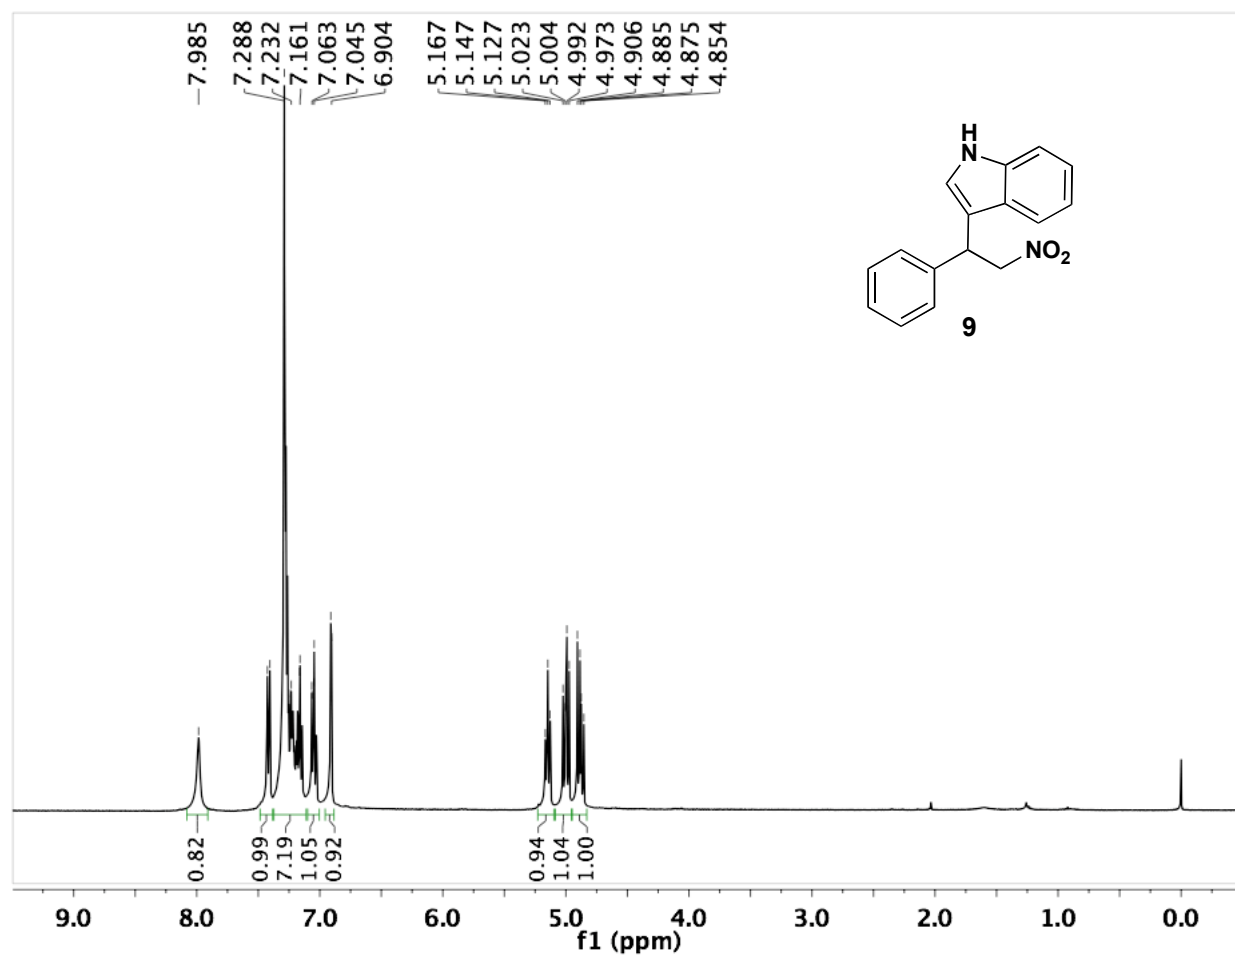



CDCl<sub>3</sub>, 100 MHz

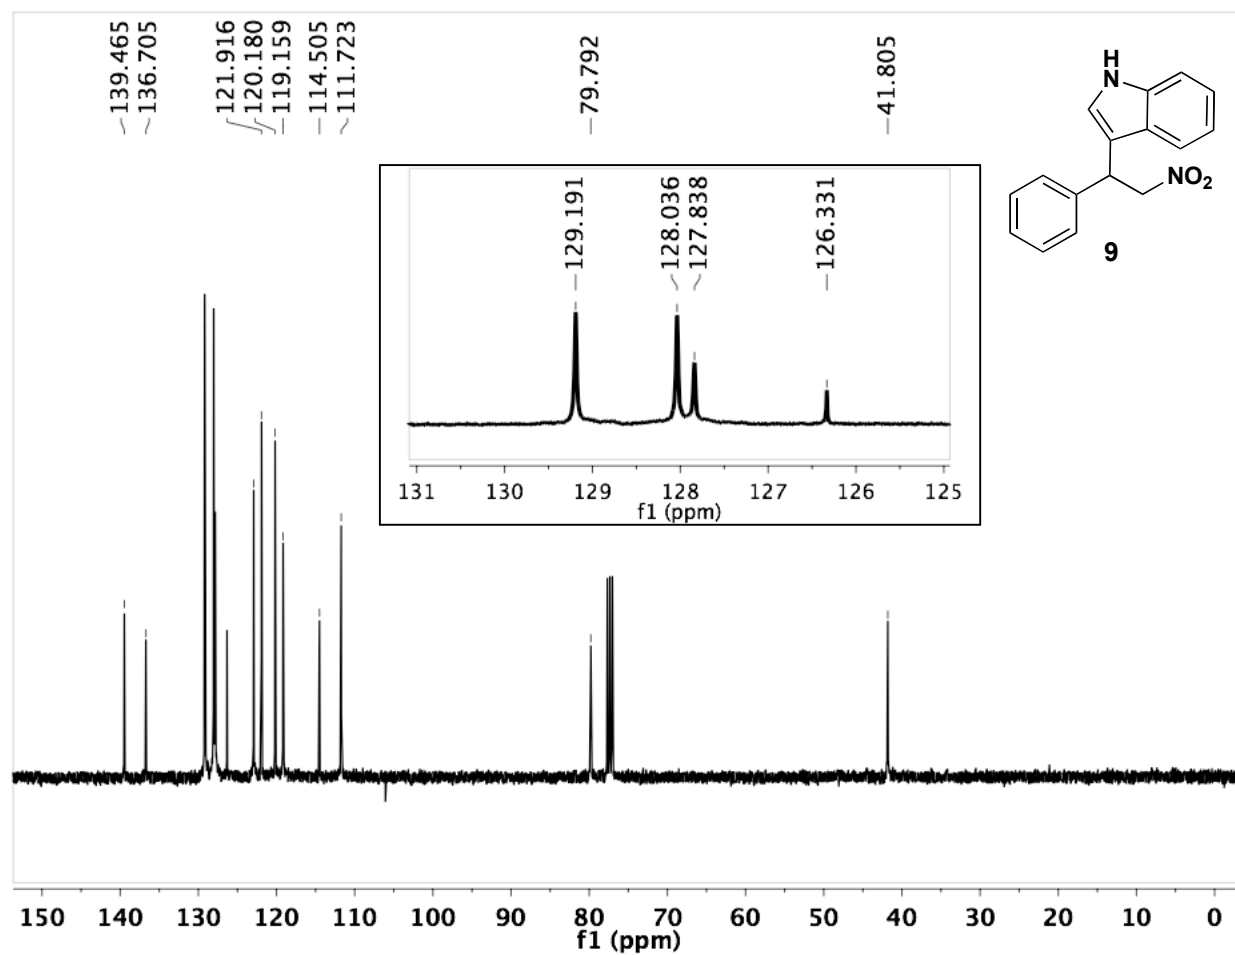

CDCl<sub>3</sub>, 400 MHz

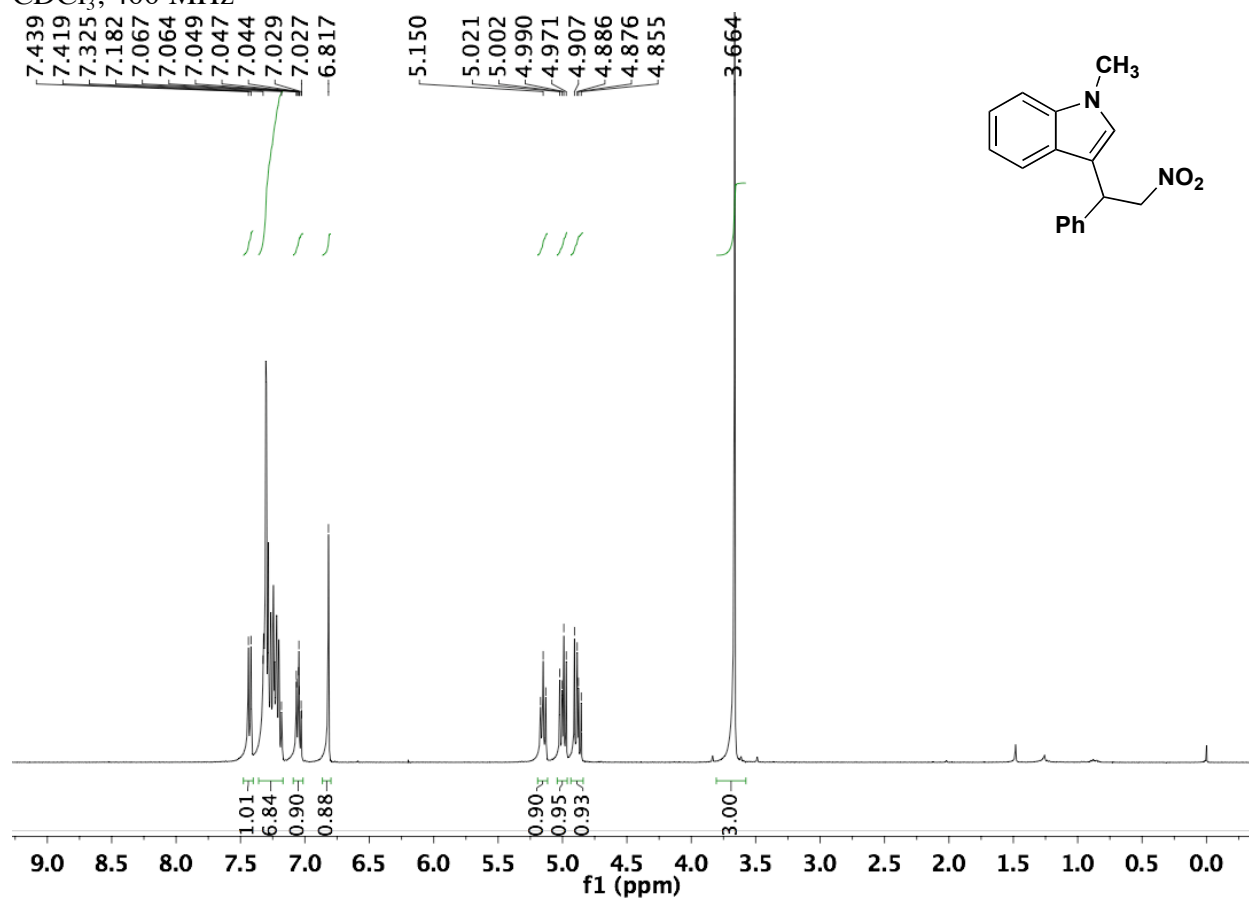

CDCl<sub>3</sub>, 100 MHz

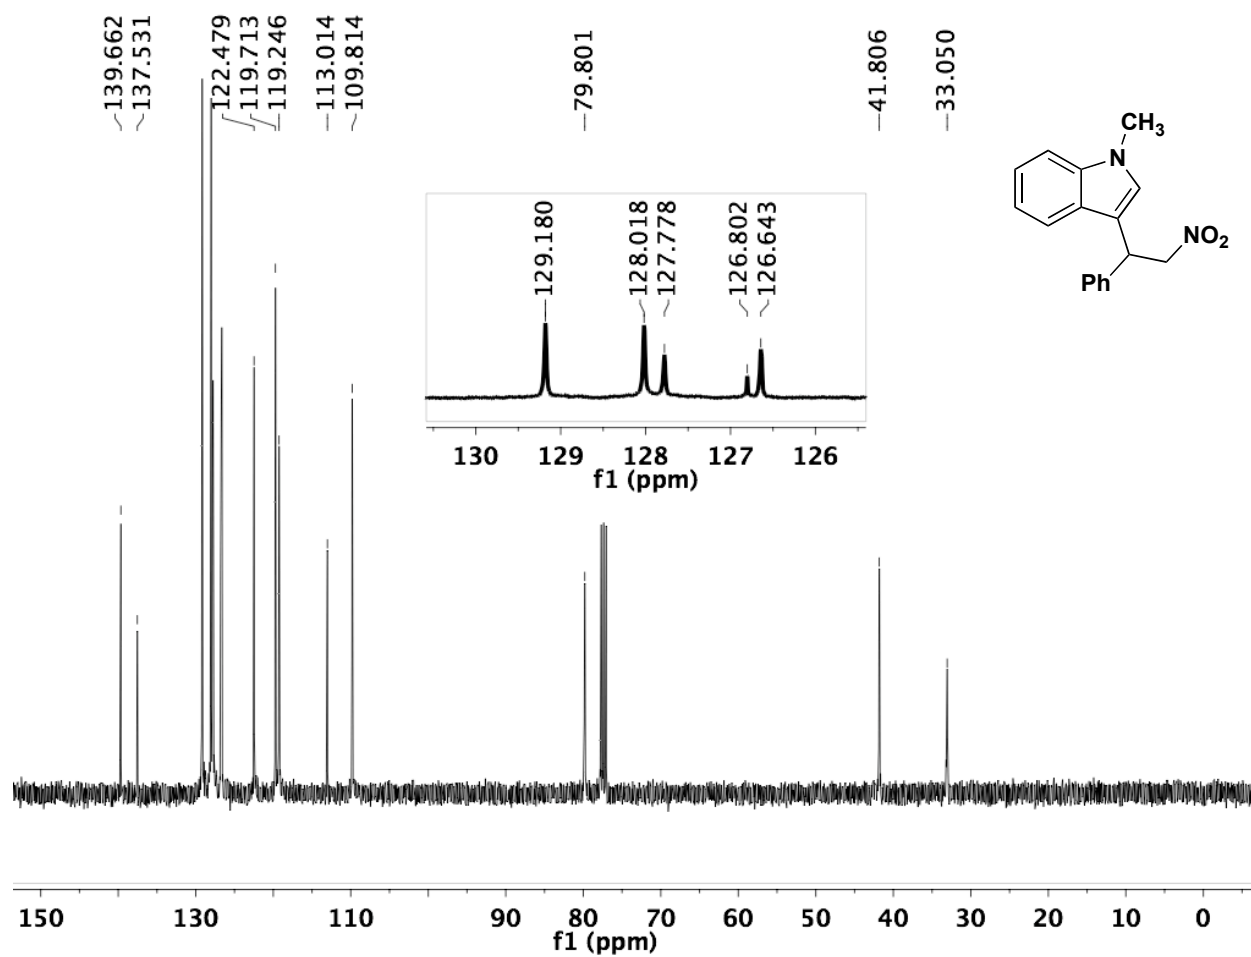

CDCl<sub>3</sub>, 400 MHz

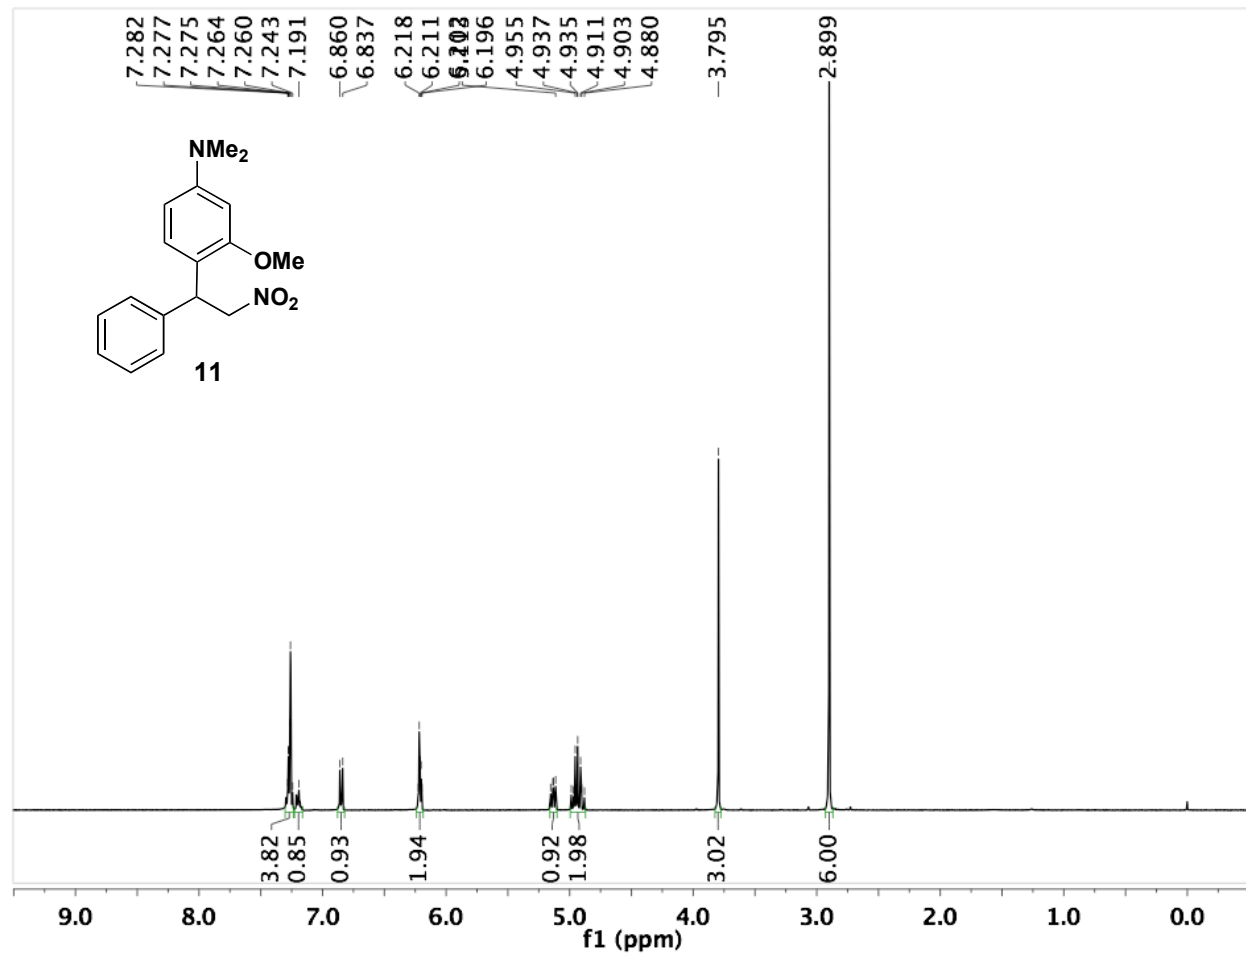

CDCl<sub>3</sub>, 100 MHz

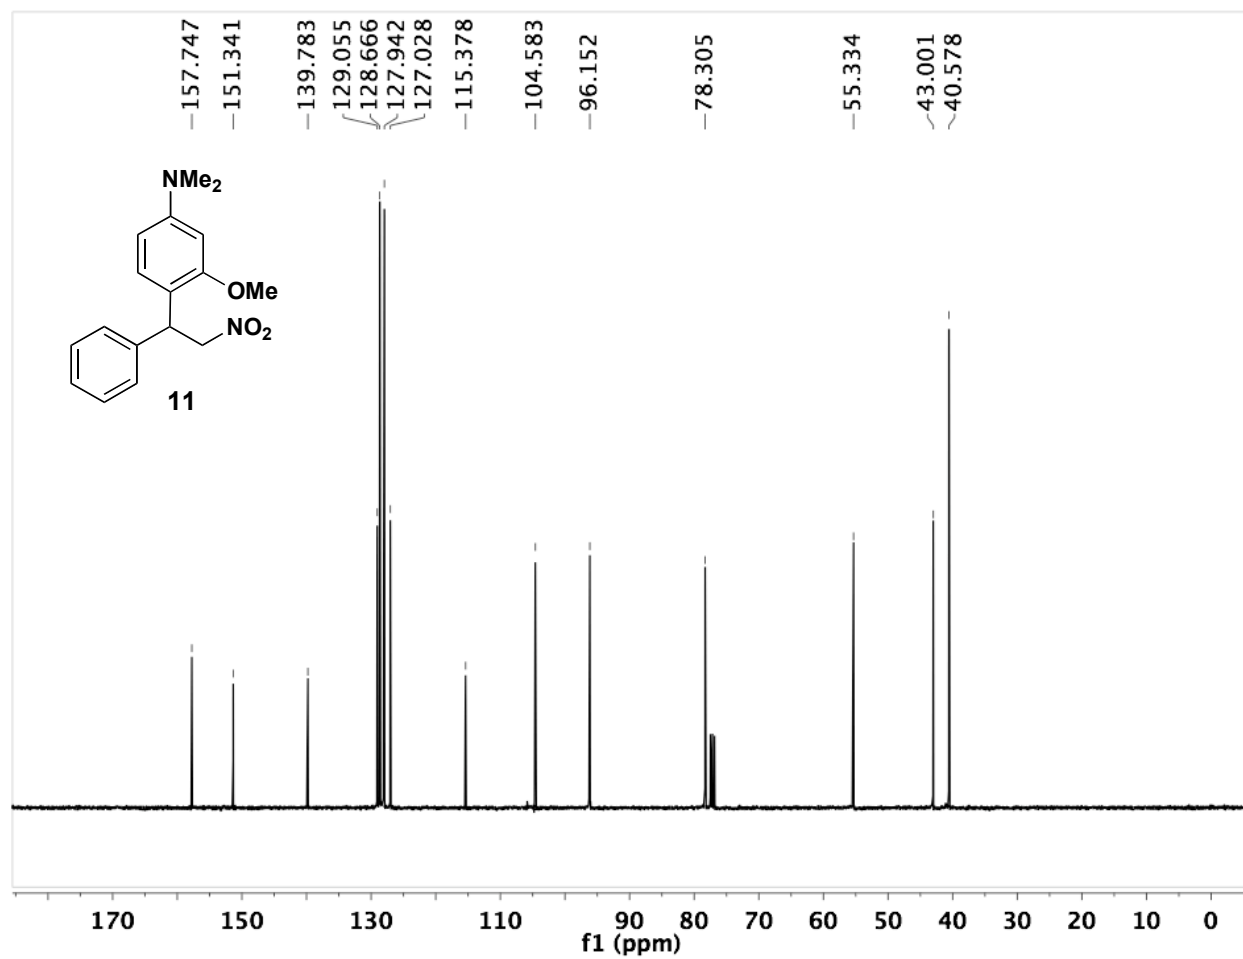

Supplement: Supplementary file 1 [file 4208650]
